# Supplementary material for: Intracellular calcium leak lowers glucose storage in human muscle, promoting hyperglycemia and diabetes
Source: eLife journal article supplement (doi:10.7554/elife.53999), 2020-05-04
Supplement: supp [file elife-53999-supp-v1.zip]

Archive with 15 entries (15 files):
- elife_poa_e53999_Figure_1_figure_supplement_1.tif
- elife_poa_e53999_Figure_2_figure_supplement_1.tif
- elife_poa_e53999_Figure_2_figure_supplement_2.tif
- elife_poa_e53999_Figure_2_figure_supplement_3.tif
- elife_poa_e53999_Figure_2_figure_supplement_4.tif
- elife_poa_e53999_Figure_2_figure_supplement_5.tif
- elife_poa_e53999_Figure_3_figure_supplement_1.tif
- elife_poa_e53999_Figure_4_figure_supplement_1.tif
- elife_poa_e53999_Figure_5_figure_supplement_1.tif
- elife_poa_e53999_Figure_5_figure_supplement_2.tif
- elife_poa_e53999_Figure_6_figure_supplement_1.tif
- elife_poa_e53999_Supplementary_file_1.docx
- elife_poa_e53999_Video_1.mp4
- elife_poa_e53999_Source_data_1.xlsx
- elife_poa_e53999_Transparent_Reporting_File.pdf
