# Supplementary material for: Intracellular calcium leak lowers glucose storage in human muscle, promoting hyperglycemia and diabetes
Source: eLife journal article supplement (doi:10.7554/elife.53999), 2020-05-04
Supplement: supp [file elife-53999-supp-v1.zip › elife_poa_e53999_Source_data_1.xlsx]

## Sheet: Glucose Metabolism MHN
Patient #	GP whole tissue	GPa whole	FBS	Glycogen	GPa microsomes	GP microsomes	PhK 105 microsomes	PhK 130 microsomes	PhK avg microsomes	PhK 105 whole	PhK 130 whole	PhK avg whole	GDE microsomes	Glut4 microsmes	GS muscle isoform microsomes	GSa muscle iso microsomes	GSa/GS m iso microsomes	SERCA main band microsomes		Patient #	Calsequestrin 1	FKBP 12
81	3.3331	2.0691	5.4	14.78	2.754	5.0507	0.5363	0.6693	1.5662	0.5862	0.4616		2.3846	0.7478	3.9771	6.2264	1.5656	11.9646		87	1.1822	0.9435
96	3.1961	1.4161	5.9	16.2366	3.3852	6.8619	0.2928	1.3525	1.456	0.1453	0.3131		1.6162	1.2958	6.9705	3.5589	0.5106	15.0258		102	0.8044	1.0355
98	2.9675	1.7937	5.1	12.8108	4.004	10.3607	0.1543	1.3608	1.1377	0.4886	0.2655		2.0362	0.2392	8.2026	3.5257	0.4298	11.1546		103	0.6361	0.7677
99	2.3784	1.0952	5.9	23.6458	2.6208	5.2755	0.5497	0.4846	0.9963	0.1151	0.1683		0.766	1.2267	6.2128	4.7146	0.7589	15.9314		105	1.9136	1.6646
102	3.189	1.054	5.1	26.2663	3.0956	9.1438	0.7646	0.8793	2.5016	0.4392	0.9865		2.7697	2.2335	7.7888	9.2924	1.193	20.7221		117	1.1916	2.6761
103	4.1006	1.0523	5	8.5033	1.8496	4.2282	0.2314	0.6294	1.2691	0.2251	0.1497		0.7	1.8383	9.6152	6.4869	0.6747	14.107		118	0.8657	1.4756
105	2.9367	1.1824	4.6	21.6662	1.9992	2.6798	0.6042	1.4524	1.373	0.4612	0.4284		0.8045	1.9416	13.6732	8.4911	0.621	21.9999		122	1.4212	1.6491
110	3.8643	1.3513	5.5	24.7061	3.0504	3.1406	0.3489	0.9776	0.6216	0.5091	0.4955		0.4744	0.7688	1.9058	3.5514	1.8635	17.3067		140	1.3511	2.0127
117	4.5404	0.9008	4.7	7.2156	2.7768	7.2595	0.5946	1.6805	0.9965	0.2649	0.1487		0.3755	1.6175	4.9672	3.0162	0.6072	27.4375		141	2.2256	1.8777
118	4.8326	1.4125	4.9	16.2565	3.5844	5.048	0.4565	1.1736	1.8232	1.1564	0.2352		2.3254	1.3209	16.5567	8.917	0.5386	25.6297		144	1.7358	2.0038
122	3.5967	1.2664	4.3	12.7296	6.16	4.2995	0.2248	1.8676	0.4631	0.5933	0.2249		0.3705	0.5556	3.0401	2.8533	0.9386	18.8865		148	3.243	3.0017
128	3.0552	1.1094	5.6	19.0257	8.2532	11.7879	0.3117	1.9338	0.9898	0.3581	0.4066		1.8489	0.1308	5.9948	12.3412	2.0587	19.7415		149	3.395	3.1386
144	4.2142	1.5341	na	6.3073	6.0716	9.7952	0.8686	1.5858	0.6878	0.3946			0.9494	0.4262	2.6411	4.3041	1.6297	20.727		150	2.3482	3.1073

## Sheet: GS, liver and muscle isoforms
Patient #, MHN	GS liver	GS muscle	GSa liver	GSa muscle		Patient#, MHS	GS liver	GS muscle	GSa liver	GSa muscle
81	1.671	3.9771	2.9916	6.2264		108	6.8289	10.3809	6.0557	8.1392
96	5.0512	6.9705	2.782	3.5589		115	7.6953	7.6059	8.9561	7.9592
8	7.1573	8.2026	4.5736	3.5257		120	4.0434	1.1684	5.1204	2.3377
99	4.1124	6.2128	4.3153	4.7146		121	5.7326	5.5086	5.2893	6.9042
102	3.5408	7.7888	3.3252	9.2924		124	5.8754	5.5415	7.9866	7.8878
103	3.6212	9.6152	5.2967	6.4869		137	2.5272	2.7339	2.5243	1.0813
105	4.46	13.6732	6.3637	8.4911		142	7.7475	5.6461	6.7573	5.5145
110	1.6415	1.9058	6.3809	3.5514		143	5.8953	5.1232	8.1428	9.9382
117	3.5785	4.9672	3.6291	3.0162		145	8.7116	4.0966	9.6806	7.4048
118	13.1309	16.5567	9.6862	8.917		147	3.4812	3.7543	7.5581	7.4813
122	4.0054	3.0401	5.4602	2.8533		156	4.4762	4.1163	5.8268	5.3806
128	12.666	5.9948	17.1318	12.3412		159	3.33	4.6704	6.9628	8.0501
144	5.7465	2.6411	4.3712	4.3041

## Sheet: SERCA and Couplon Proteins
Note: couplon proteins Casq and FKBP 12 were determined in a different group of patients than all other proteins and glycogen
Patient #, MHN	SERCA, Main band	MHN Patients for Couplon proteins	Calsequestrin 1	FKBP 12		Patient #, MHS	SERCA, Main band	MHS Patients for Couplon proteins	Calsequestrin 1	FKBP 12
81	11.9646	87	1.1822	0.9435		108	20.2828	84	2.5154	2.6397
96	15.0258	102	0.8044	1.0355		115	7.2133	101	1.2215	1.2038
98	11.1546	103	0.6361	0.7677		120	19.2615	108	1.0667	1.7503
99	15.9314	105	1.9136	1.6646		121	19.1887	115	0.686	0.9401
102	20.7221	117	1.1916	2.6761		124	25.3216	120	2.2911	1.8412
103	14.107	118	0.8657	1.4756		137	27.4786	121	2.1751	1.8334
105	21.9999	122	1.4212	1.6491		142	19.9016	124	1.3914	2.0247
110	17.3067	140	1.3511	2.0127		143	19.2055	142	1.6527	2.4197
117	27.4375	141	2.2256	1.8777		145	13.4369	143	0.4356	1.3553
118	25.6297	144	1.7358	2.0038		147	14.949	145	2.9686	3.2906
122	18.8865	148	3.243	3.0017		156	10.8667	147	failed	failed
128	19.7415	149	3.395	3.1386		159	11.3208	156	failed	failed
144	20.727	150	2.3482	3.1073

## Sheet: Probable error in W blots
Lane	Tech repeat	Patient #1	Patient #2	Patient #3	Patient #4
1	1	1.0418	1.6435	2.9301	6.1026
1	2	1.0851	1.7318	3.0812	6.4995
1	3	1.0389	1.8676	3.1621	6.4281
1	4	1.2047	1.7158	3.1677	6.4564
1	5	1.2002	1.6703	3.028	6.2278
2	1	1.0158	1.3484	2.0652	7.7926
2	2	1.2493	1.3696	2.1958	7.8977
2	3	1.2122	1.4432	2.1431	8.204
2	4	1.3186	1.5039	2.1187	8.0405
2	5	1.0444	1.429	2.2579	7.9017
3	1	1.3081	1.427	2.0316	5.5192
3	2	1.3545	1.5422	2.1099	5.4846
3	3	1.3915	1.4808	2.0784	5.592
3	4	1.3648	1.3747	1.9815	5.3018
3	5	1.2733	1.3666	2.008	5.2496

## Sheet: Direct quantification in gels 
Note, no Western Blot data. All data in this sheet derived from Ponceau-stained protein gels
Patient #, MHN	130 kDa band (Ponceau)	180 kDa	REF (Ponceau)		Patient #, MHS	130 kDa band (Ponceau)	180 kDa	REF (Ponceau)
81	2.475	0.9096	19.9181		108	5.5571	0.8708	17.3223
96	2.93	0.9466	19.8089		115	3.4181	0.7103	19.1535
98	3.488	1.173	16.5324		120	2.4907	0.5418	21.9632
99	2.871	0.8984	17.8423		121	3.7442	0.7787	22.3682
102	3.3656	1.0789	20.2979		124	3.8153	0.6686	21.804
103	2.3916	0.7008	22.897		137	3.1375	0.7176	19.3071
105	2.4177	0.7598	19.85		142	3.9529	1.0306	23.3533
110	2.7388	0.7071	18.7176		143	3.9156	0.9863	21.7051
117	3.1228	0.7144	19.4798		145	4.3472	1.1271	18.0405
118	3.0867	1.1238	16.8562		147	4.4726	1.2408	18.1595
122	2.2434	0.7617	19.3177		156	3.6384	1.0134	20.1558
128	4.3945	0.9223	14.243		159	4.4095	1.1222	19.1561
144	3.9506	0.9253	20.5965

## Sheet: GPa vs. Ca2+
Lanes	[Ca], nM	GP (Western)	REF (Ponceau)	GPa (Western)	REF (Ponceau)	GPa/GP		Patient #	GPa (100 nM Ca)	GPa (300)	GPa (500)
1	100	5.3163	20.3131	0.2717	19.7757	0.0511		158	0.0511		0.7308
2	500	5.5365	16.4171	4.0462	15.9907	0.7308		163	0.1102		1.1395
3	100	3.8726	16.8469	0.4268	18.3079	0.1102		159	1.2277		1.7979
4	500	4.2251	12.6072	4.8143	13.4036	1.1395		164	1.4216	2.3763	2.8972
5	100	1.2627	11.6198	1.5502	11.4225	1.2277
6	500	2.7884	13.4137	5.0132	14.314	1.7979
7	100	1.4267	17.7488	2.0281	17.244	1.4216
8	300	2.2515	17.3763	5.3502	16.3394	2.3763
9	500	2.4966	12.7528	7.233	13.9081	2.8972

## Sheet: Glucose Metabolism MHS
Patient #	GP whole tissue	GPa whole	FBS	Glycogen	GPa microsomes	GP microsomes	PhK 105 microsomes	PhK 130 microsomes	PhK avg microsomes	PhK 105 whole	PhK 130 whole	PhK avg whole	GDE microsomes	Glut4 microsmes	GS muscle isoform microsomes	GSa muscle iso microsomes	GSa/GS m iso microsomes	SERCA main band microsomes		Patient #	Calsequestrin 1	FKBP 12
108	3.1584	1.6219	4.1	11.7249	5.0692	12.2077	2.6675	3.7967	2.4871	0.9982	0.9086	0.9534	1.0322	1.4549	10.3809	8.1392	0.8868	20.2828		84	2.5154	2.6397
115	2.7648	1.1556	5	14.5229	3.4848	8.6326	1.3375	3.3201	1.2755	0.3465	0.7455	0.546	0.8139	0.4616	7.6059	7.9592	1.1638	7.2133		101	1.2215	1.2038
120	3.6961	1.5464	5.2	9.4783	2.8336	5.9987	0.1685	3.9885	2.4871	1.0581	0.3252	0.6916	1.8091	0.678	1.1684	2.3377	1.2664	19.2615		108	1.0667	1.7503
121	4.6997	2.0367	4.8	9.0756	4.0432	10.2859	1.8692	2.7327	1.6996	0.7715	0.6377	0.7046	0.9126	0.7869	5.5086	6.9042	0.9227	19.1887		115	0.686	0.9401
124	4.27	2.1338	5.7	4.5261	4.455	11.2989	3.7357	3.4044	1.4584	0.8947	0.9212	0.908	0.8771	0.5813	5.5415	7.8878	1.3593	25.3216		120	2.2911	1.8412
137	4.002	1.6125	5.1	11.0569	4.345	8.2611	2.3182	1.4306	1.5665	0.9023	0.1549	0.5286	1.0278	0.5386	2.7339	1.0813	0.9988	27.4786		121	2.1751	1.8334
142	4.2966	2.0271	6	8.8102	4.1888	15.7819	0.9685	2.4788	1.304	1.139	0.2583	0.6986	1.1362	0.1678	5.6461	5.5145	0.8722	19.9016		124	1.3914	2.0247
143	4.5659	3.3622	5.7	10.6767	8.322	15.7397	2.112	2.7412	2.7464	1.0249	0.3077	0.6663	2.3236	0.4227	5.1232	9.9382	1.3812	19.2055		142	1.6527	2.4197
145	3.3626	2.6894	6.9	14.6441	5.5142	13.966	2.2441	6.4713	1.8549	1.7997	0.8753	1.3375	0.9321	0.9228	4.0966	7.4048	1.1112	13.4369		143	0.4356	1.3553
147	4.4698	2.5869	5.2	5.5887	15.1962	25.3438	6.1566	5.8652	4.5453	1.3664	1.4147	1.3905	4.1038	0.4415	3.7543	7.4813	2.1711	14.949		145	2.9686	3.2906
156	4.8358	3.1645	6.1	8.8119	14.9962	11.7494	4.7353	2.2611	1.8479	1.8713	2.7202	2.2957	1.5937	0.2542	4.1163	5.3806	1.3017	10.8667		147	failed	failed
159	5.0881	2.7144	5.5	4.8613	5.5238	11.3425	3.8488	4.7965	3.7964	2.1077	1.9411	2.0244	2.7265	1.0699	4.6704	8.0501	2.0909	11.3208		156	failed	failed

## Sheet: glycogen in 4 deg vs frozen
sucrose added(µl/µg Micrsomal protein)		sample		abs	abs-blank	final abs	glycogen levels (µg/µg microsomal protein)
0.4		177 standard 1		0.834	0.738	0.722	1.35
0.4		177 standard 2		0.785	0.689	0.673	1.25
0.4		177 standard 3		0.735	0.639	0.623	1.16
0.4		177 Snap frozen 1		0.699	0.603	0.587	1.09
0.4		177 Snap frozen 2		0.701	0.605	0.589	1.1
0.4		177 Snap frozen 3		0.731	0.635	0.619	1.15
		178, MHH		abs	abs-blank	final abs	glycogen levels (µg/µg microsomal protein)
		standard 1		0.895	0.807	0.801	1.95
		standard 2		0.889	0.802	0.794	1.93
		standard 3		0.859	0.771	0.765	1.86
		snap frozen 1		0.833	0.745	0.739	1.8
		snap frozen 2		0.892	0.804	0.798	1.94
		snap frozen 3		0.826	0.738	0.732	1.78
