# Supplementary figures and images for: Intracellular calcium leak lowers glucose storage in human muscle, promoting hyperglycemia and diabetes
Source: eLife journal article supplement (doi:10.7554/elife.53999), 2020-05-04

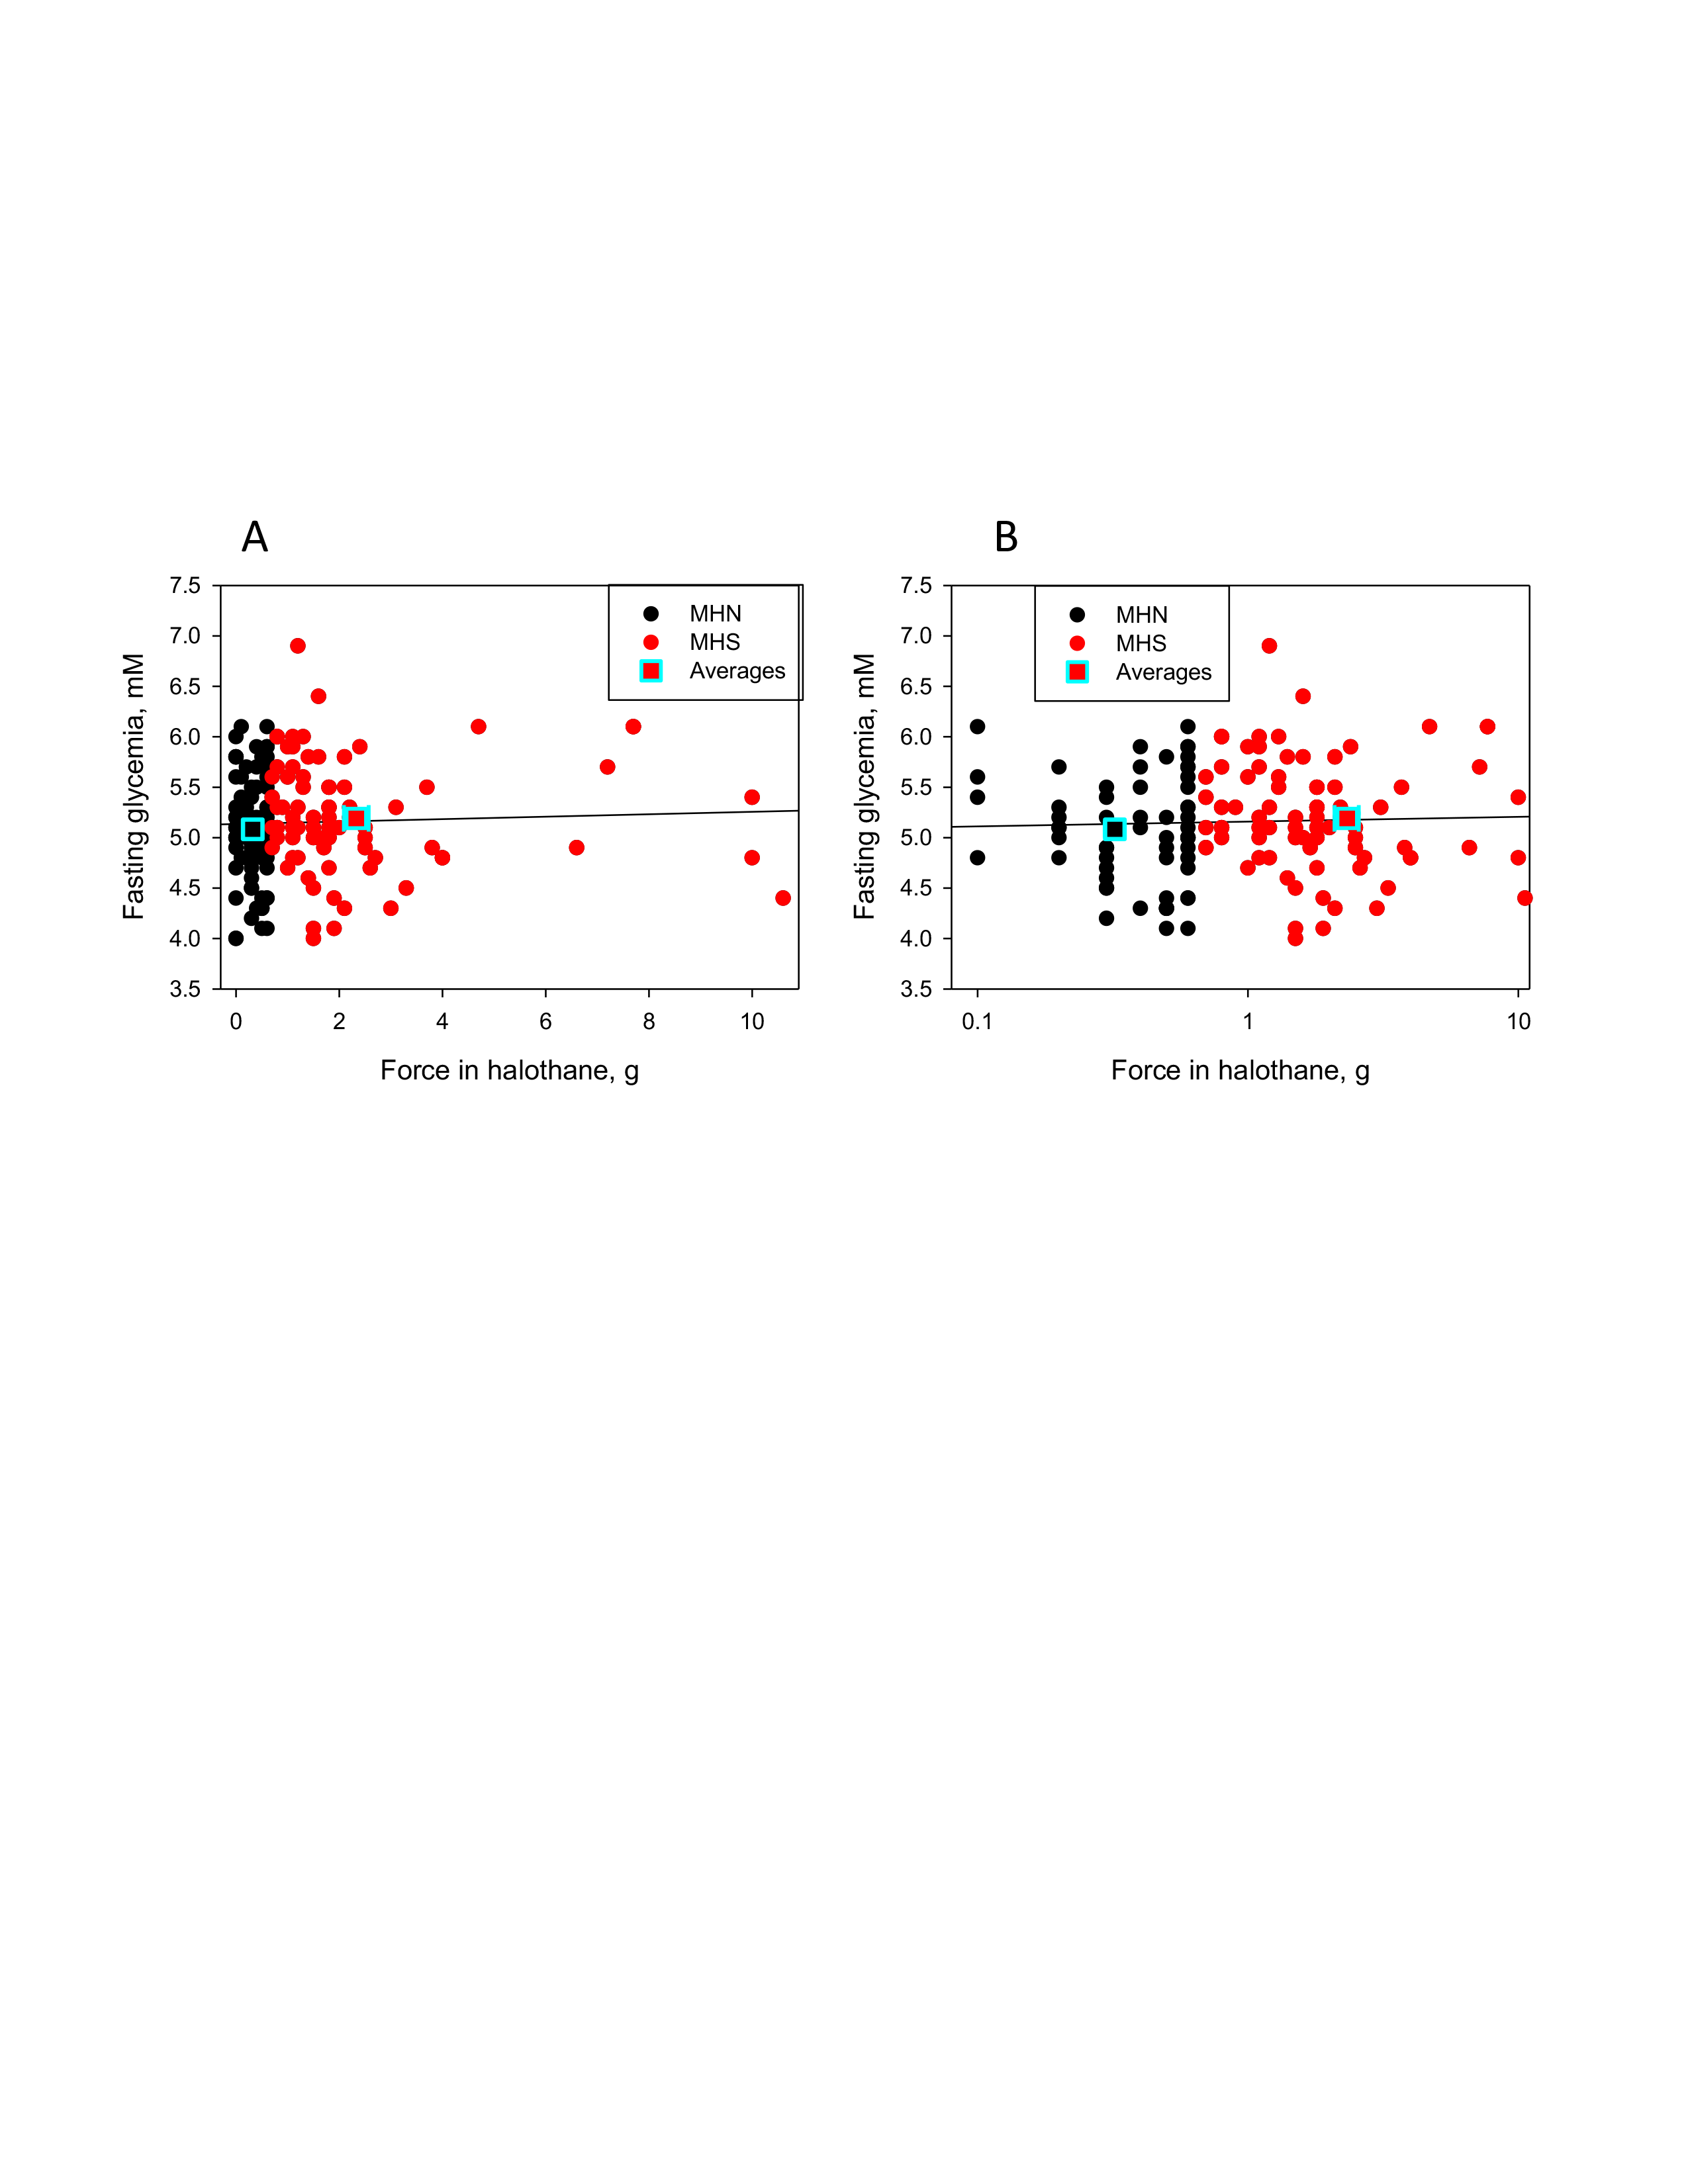

Supplement: supp [file elife-53999-supp-v1.zip › elife_poa_e53999_Figure_1_figure_supplement_1.tif]

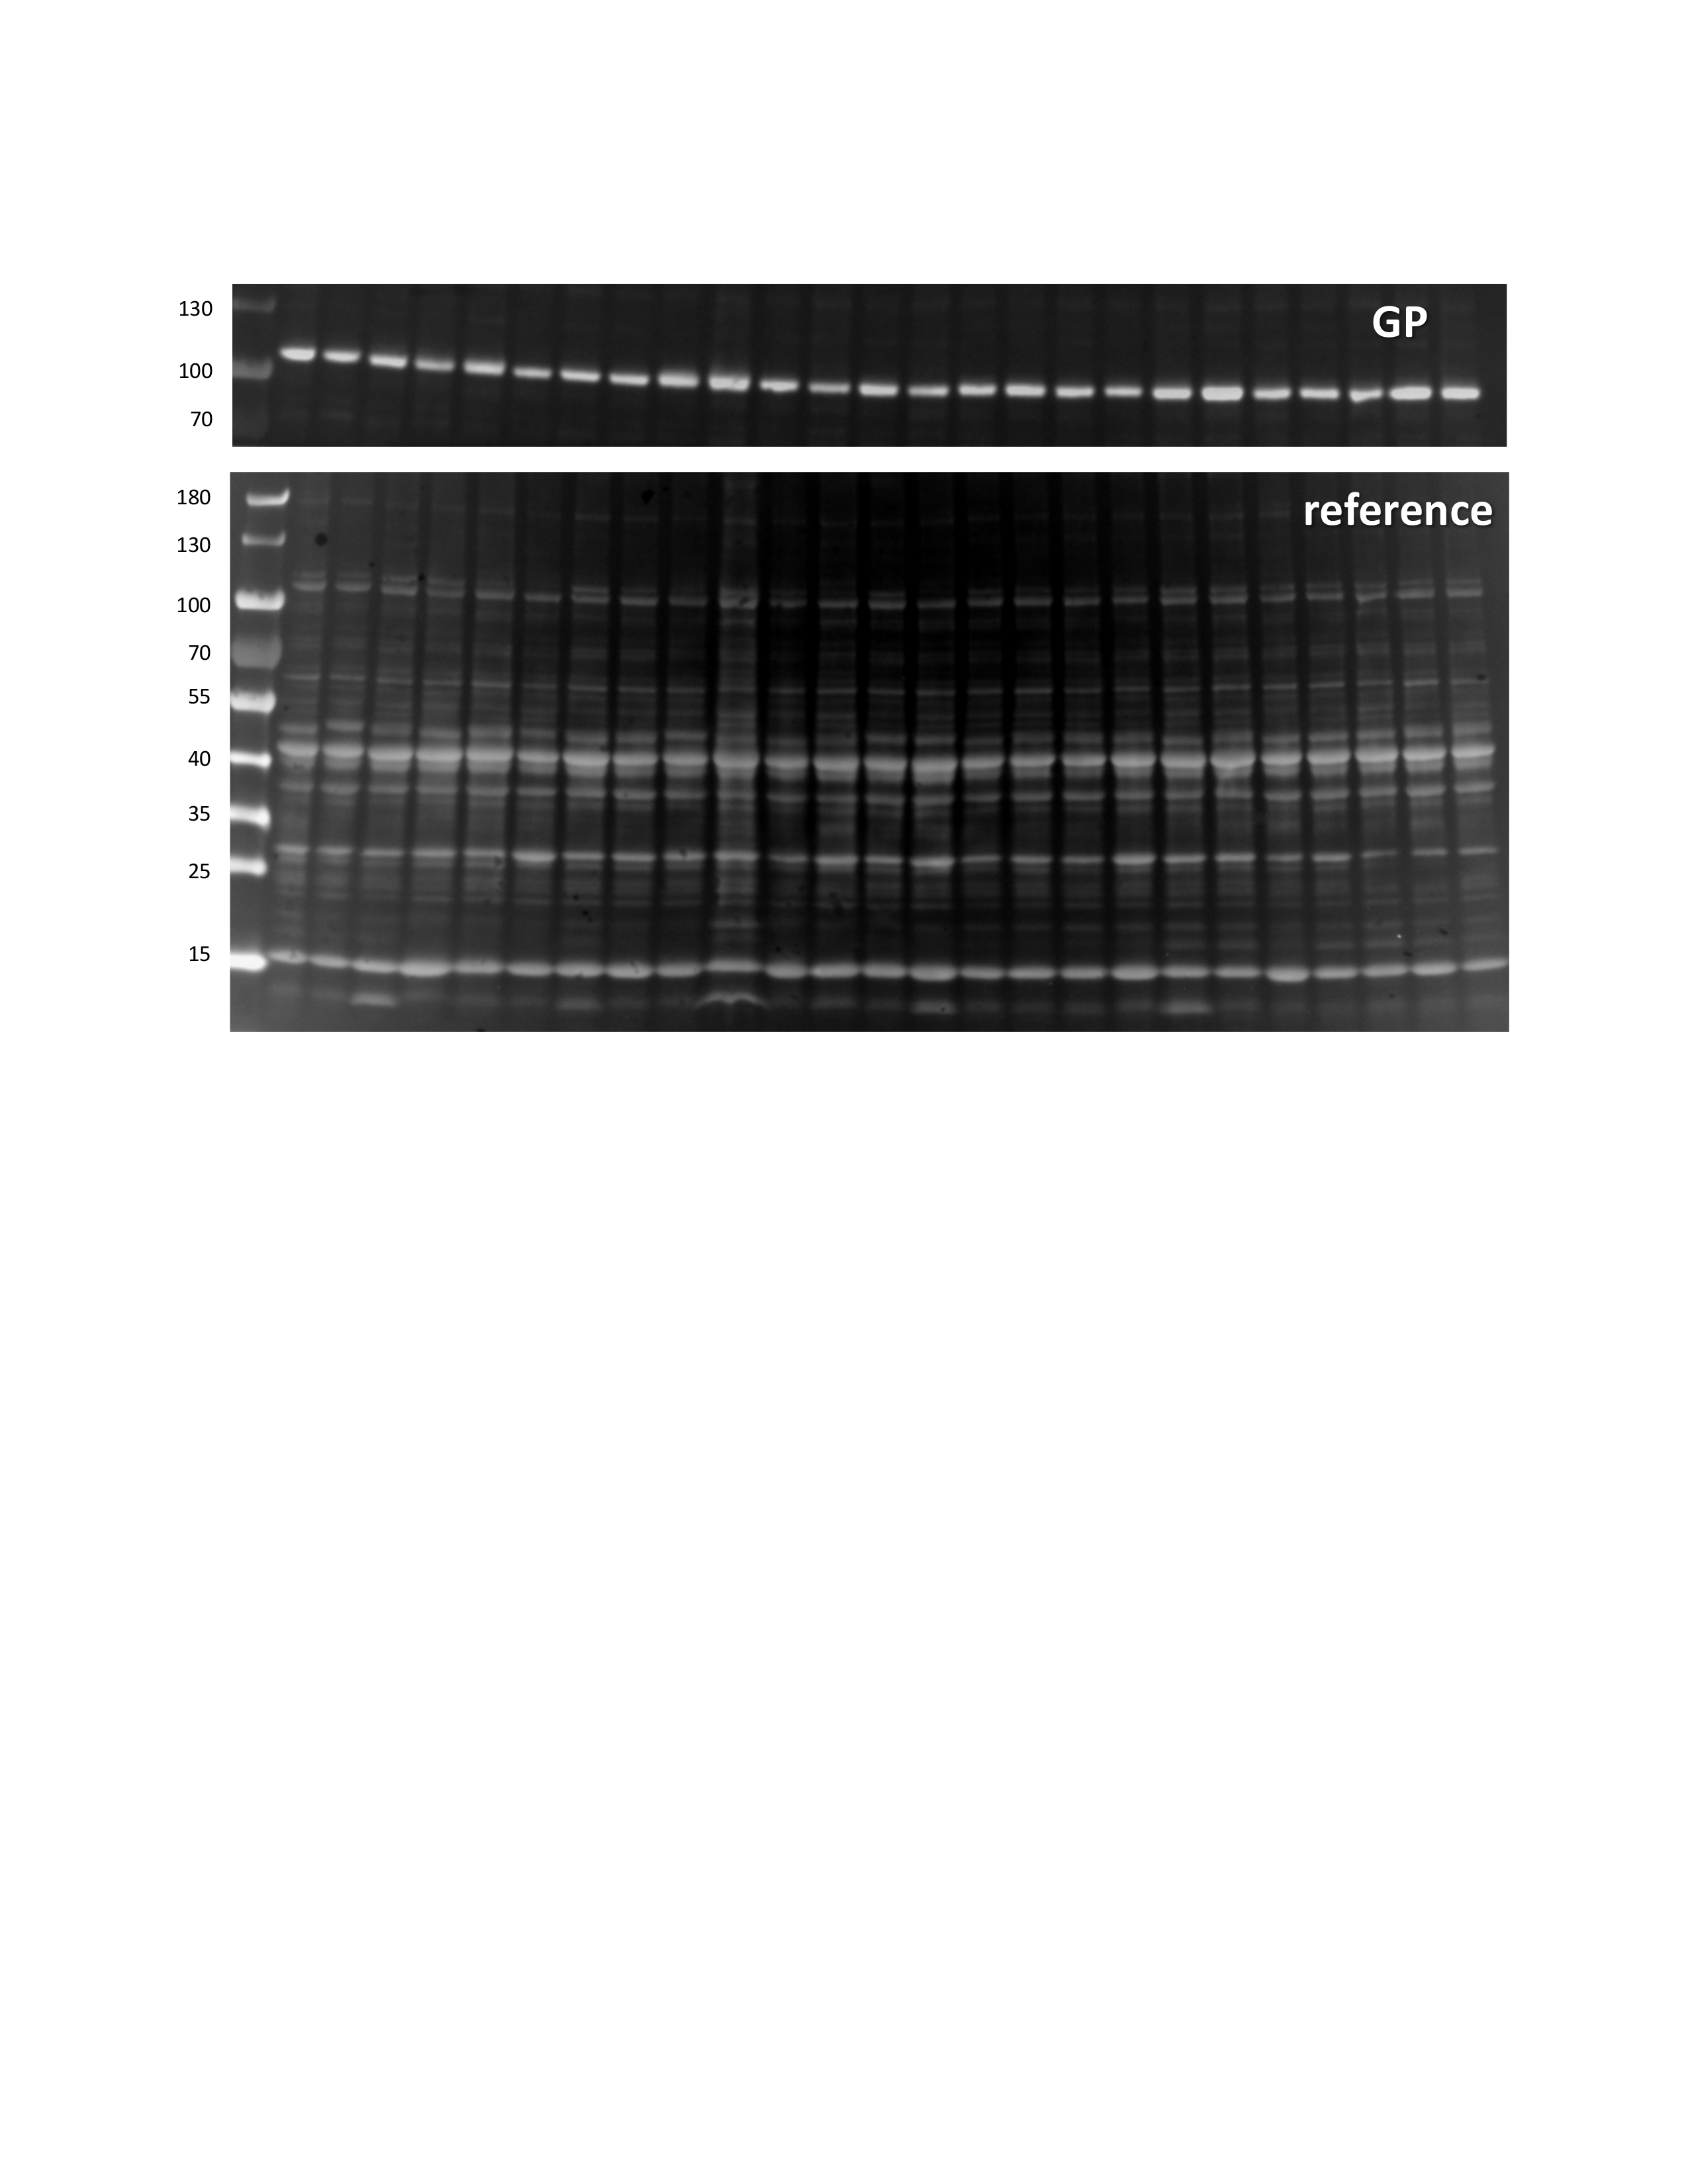

Supplement: supp [file elife-53999-supp-v1.zip › elife_poa_e53999_Figure_2_figure_supplement_1.tif]

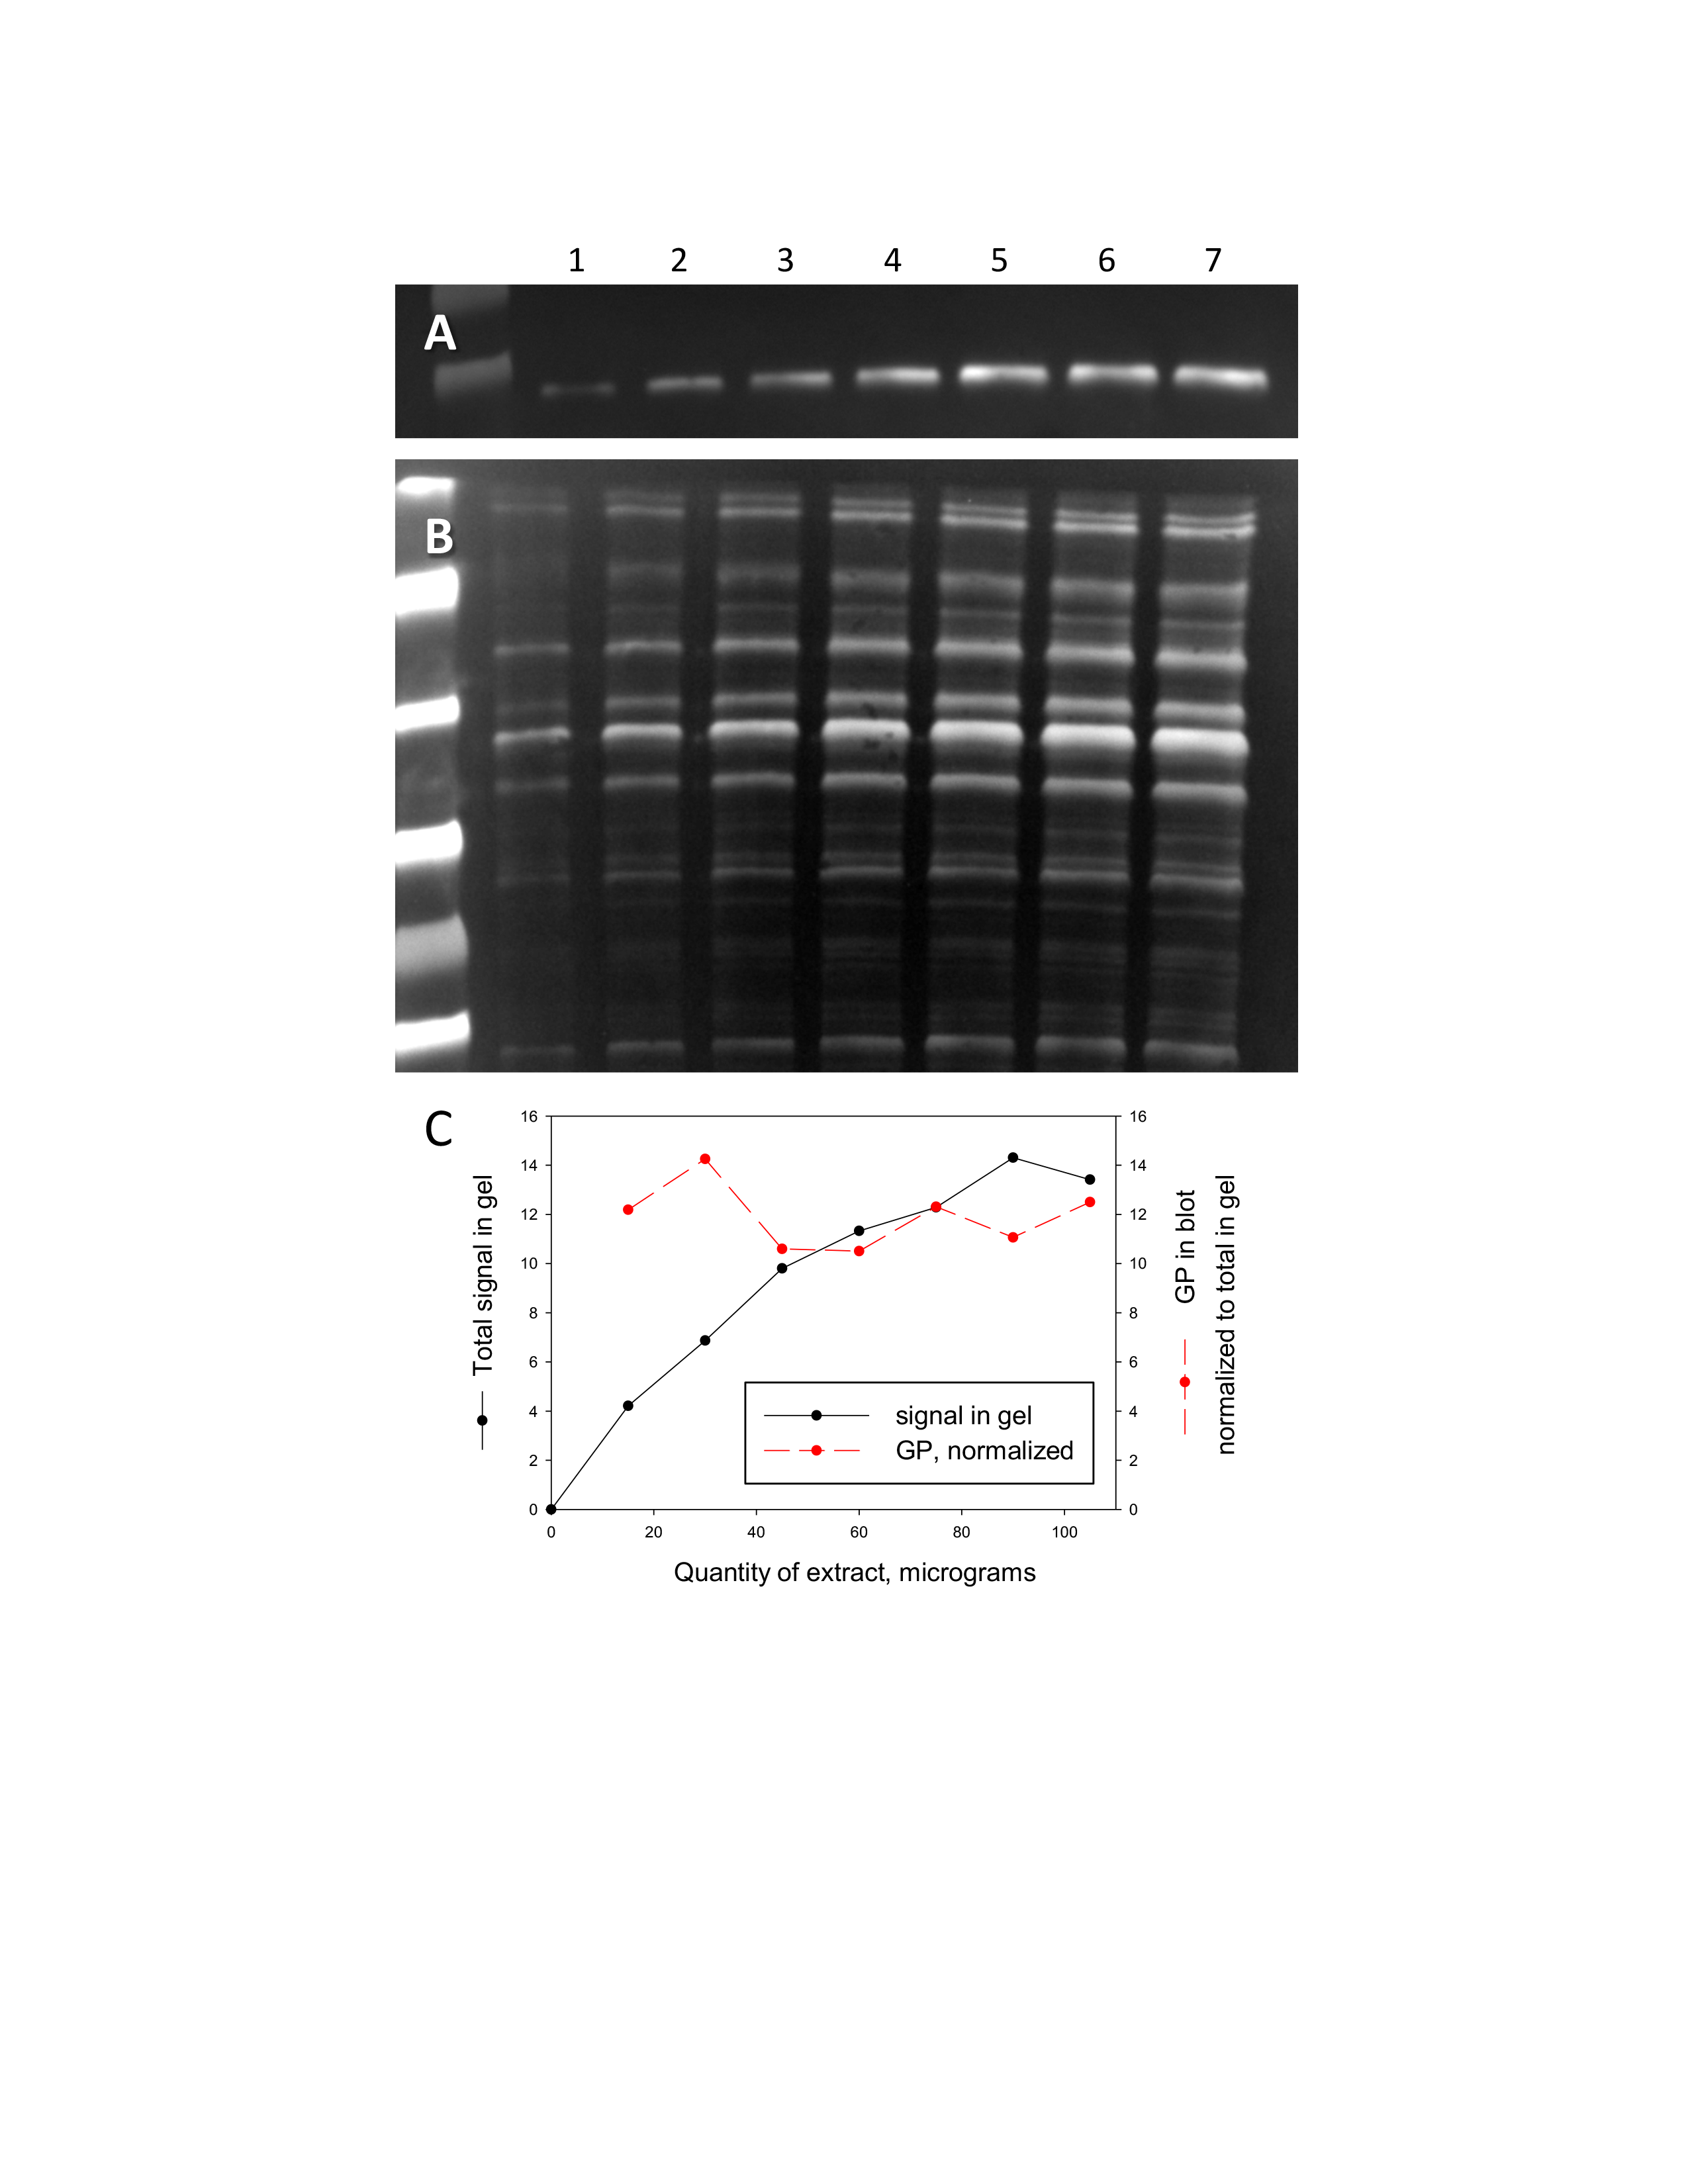

Supplement: supp [file elife-53999-supp-v1.zip › elife_poa_e53999_Figure_2_figure_supplement_2.tif]

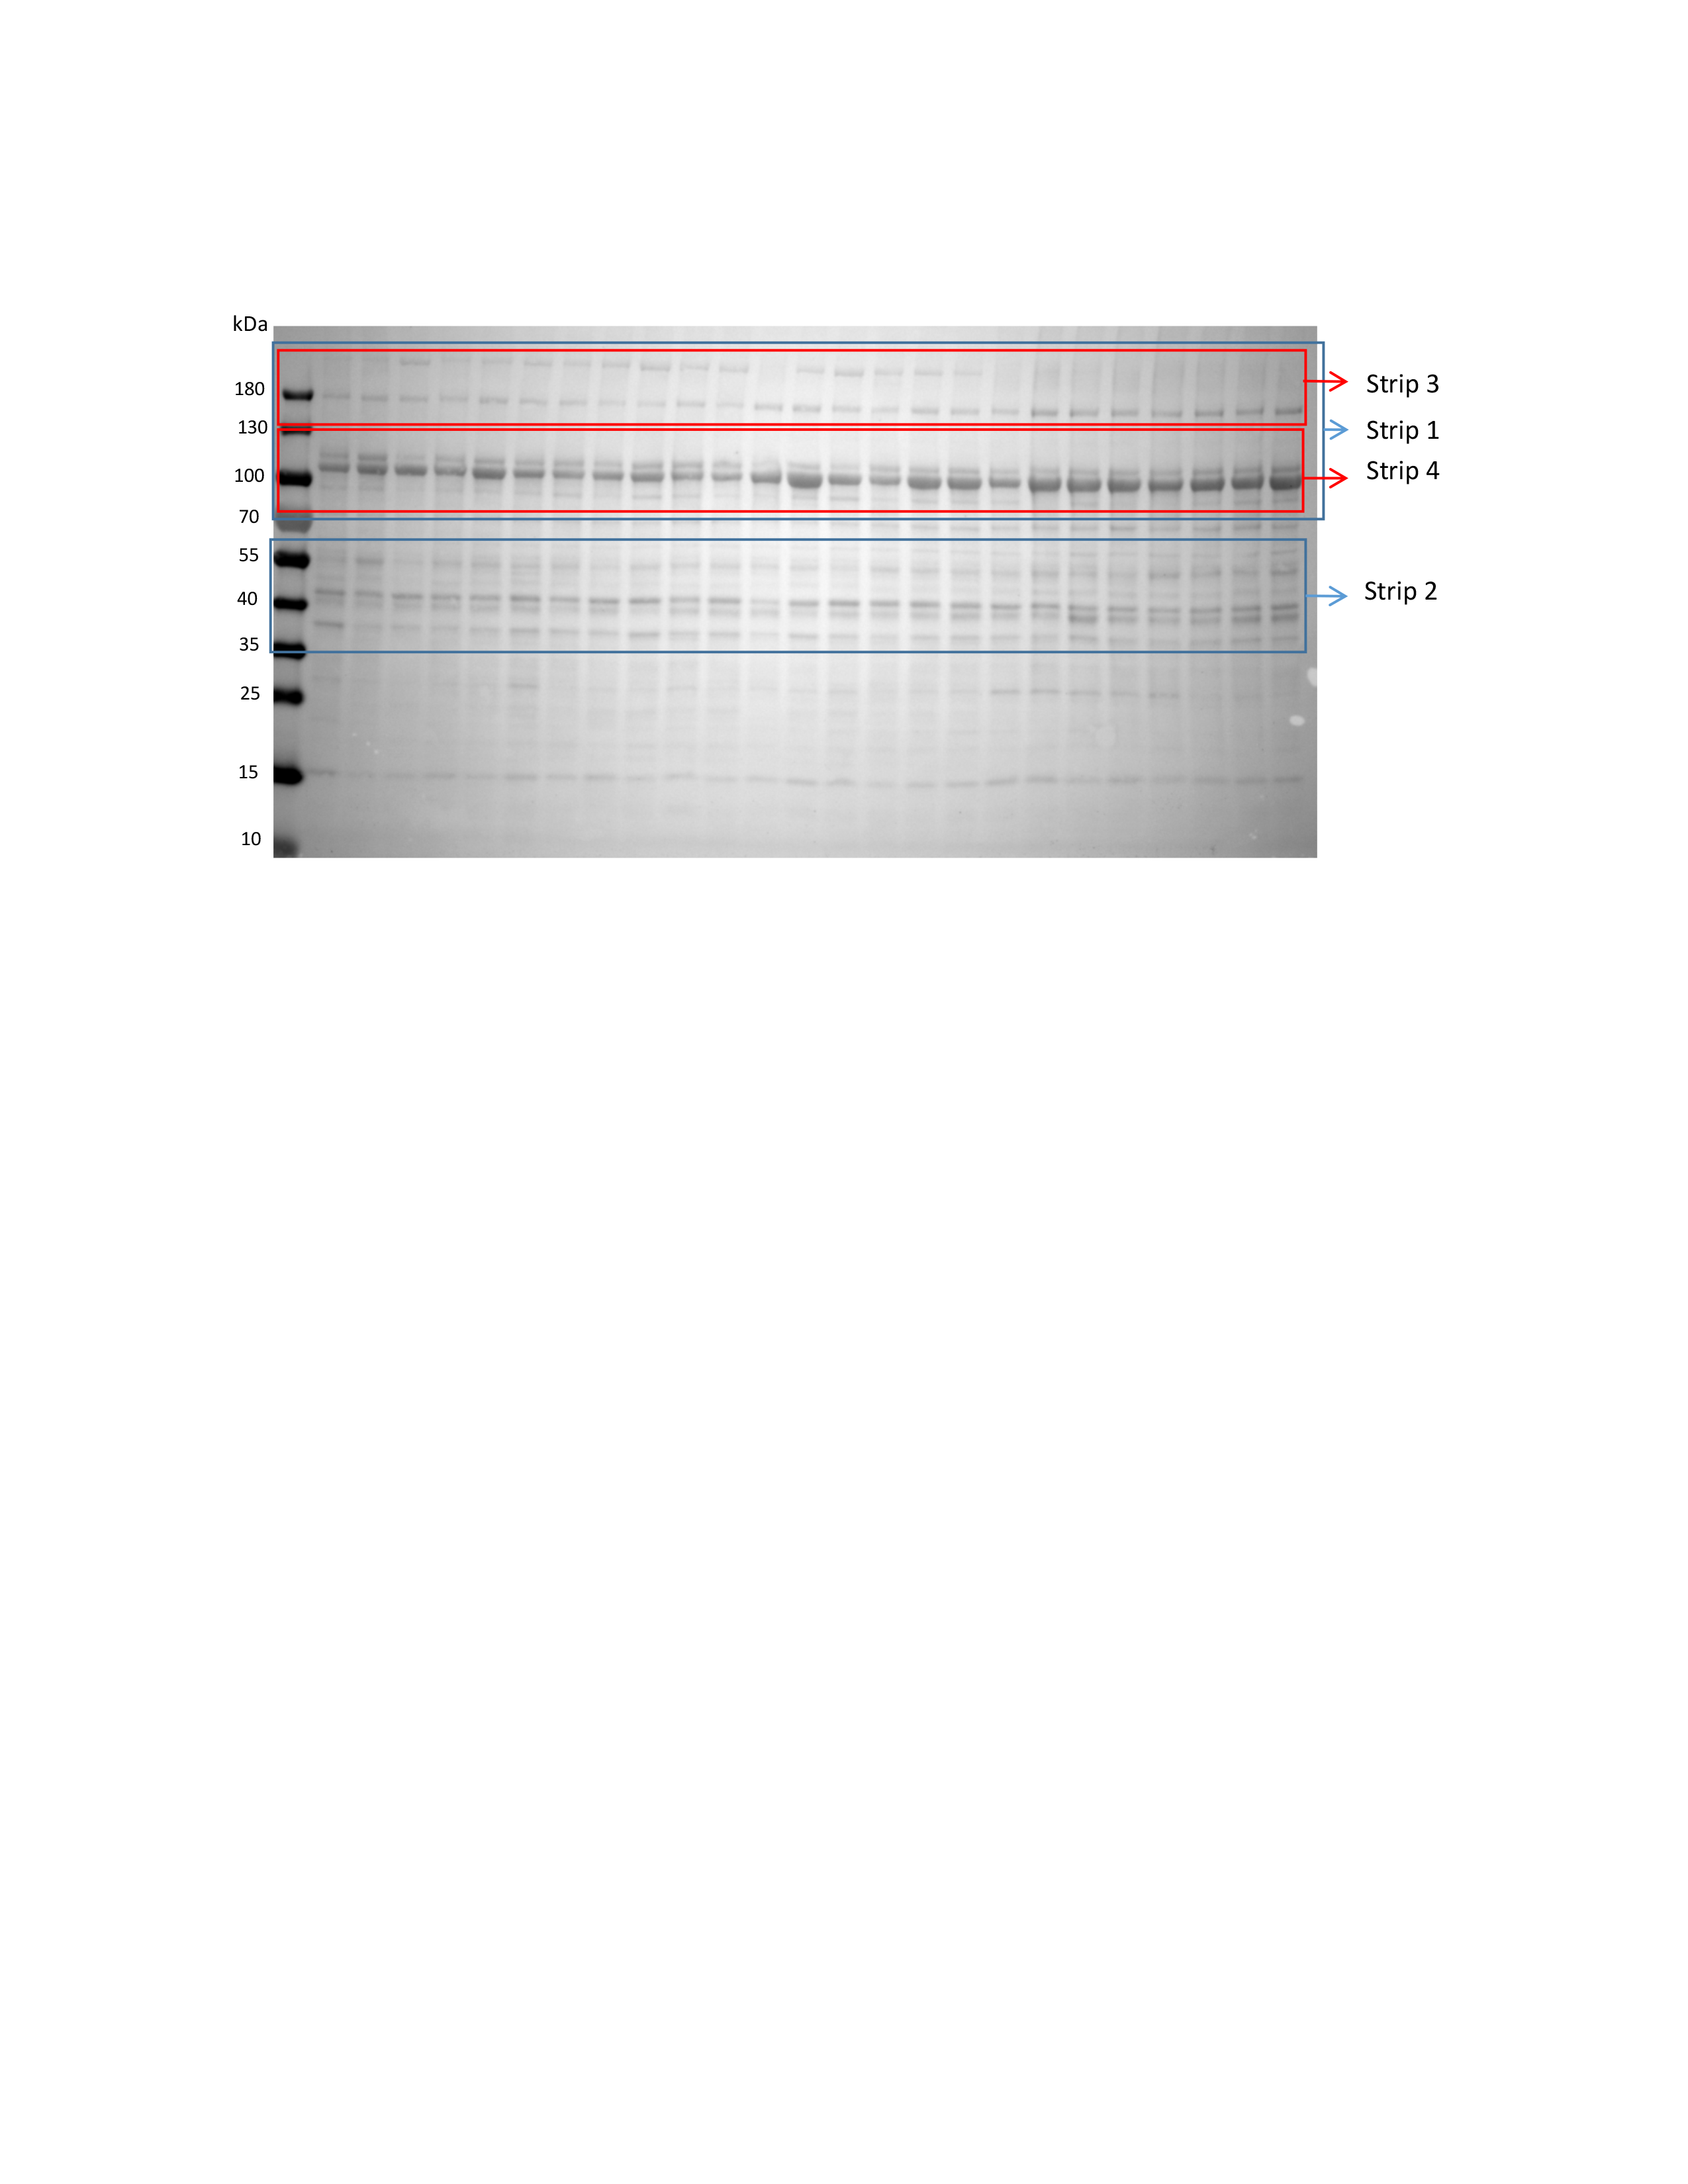

Supplement: supp [file elife-53999-supp-v1.zip › elife_poa_e53999_Figure_2_figure_supplement_3.tif]

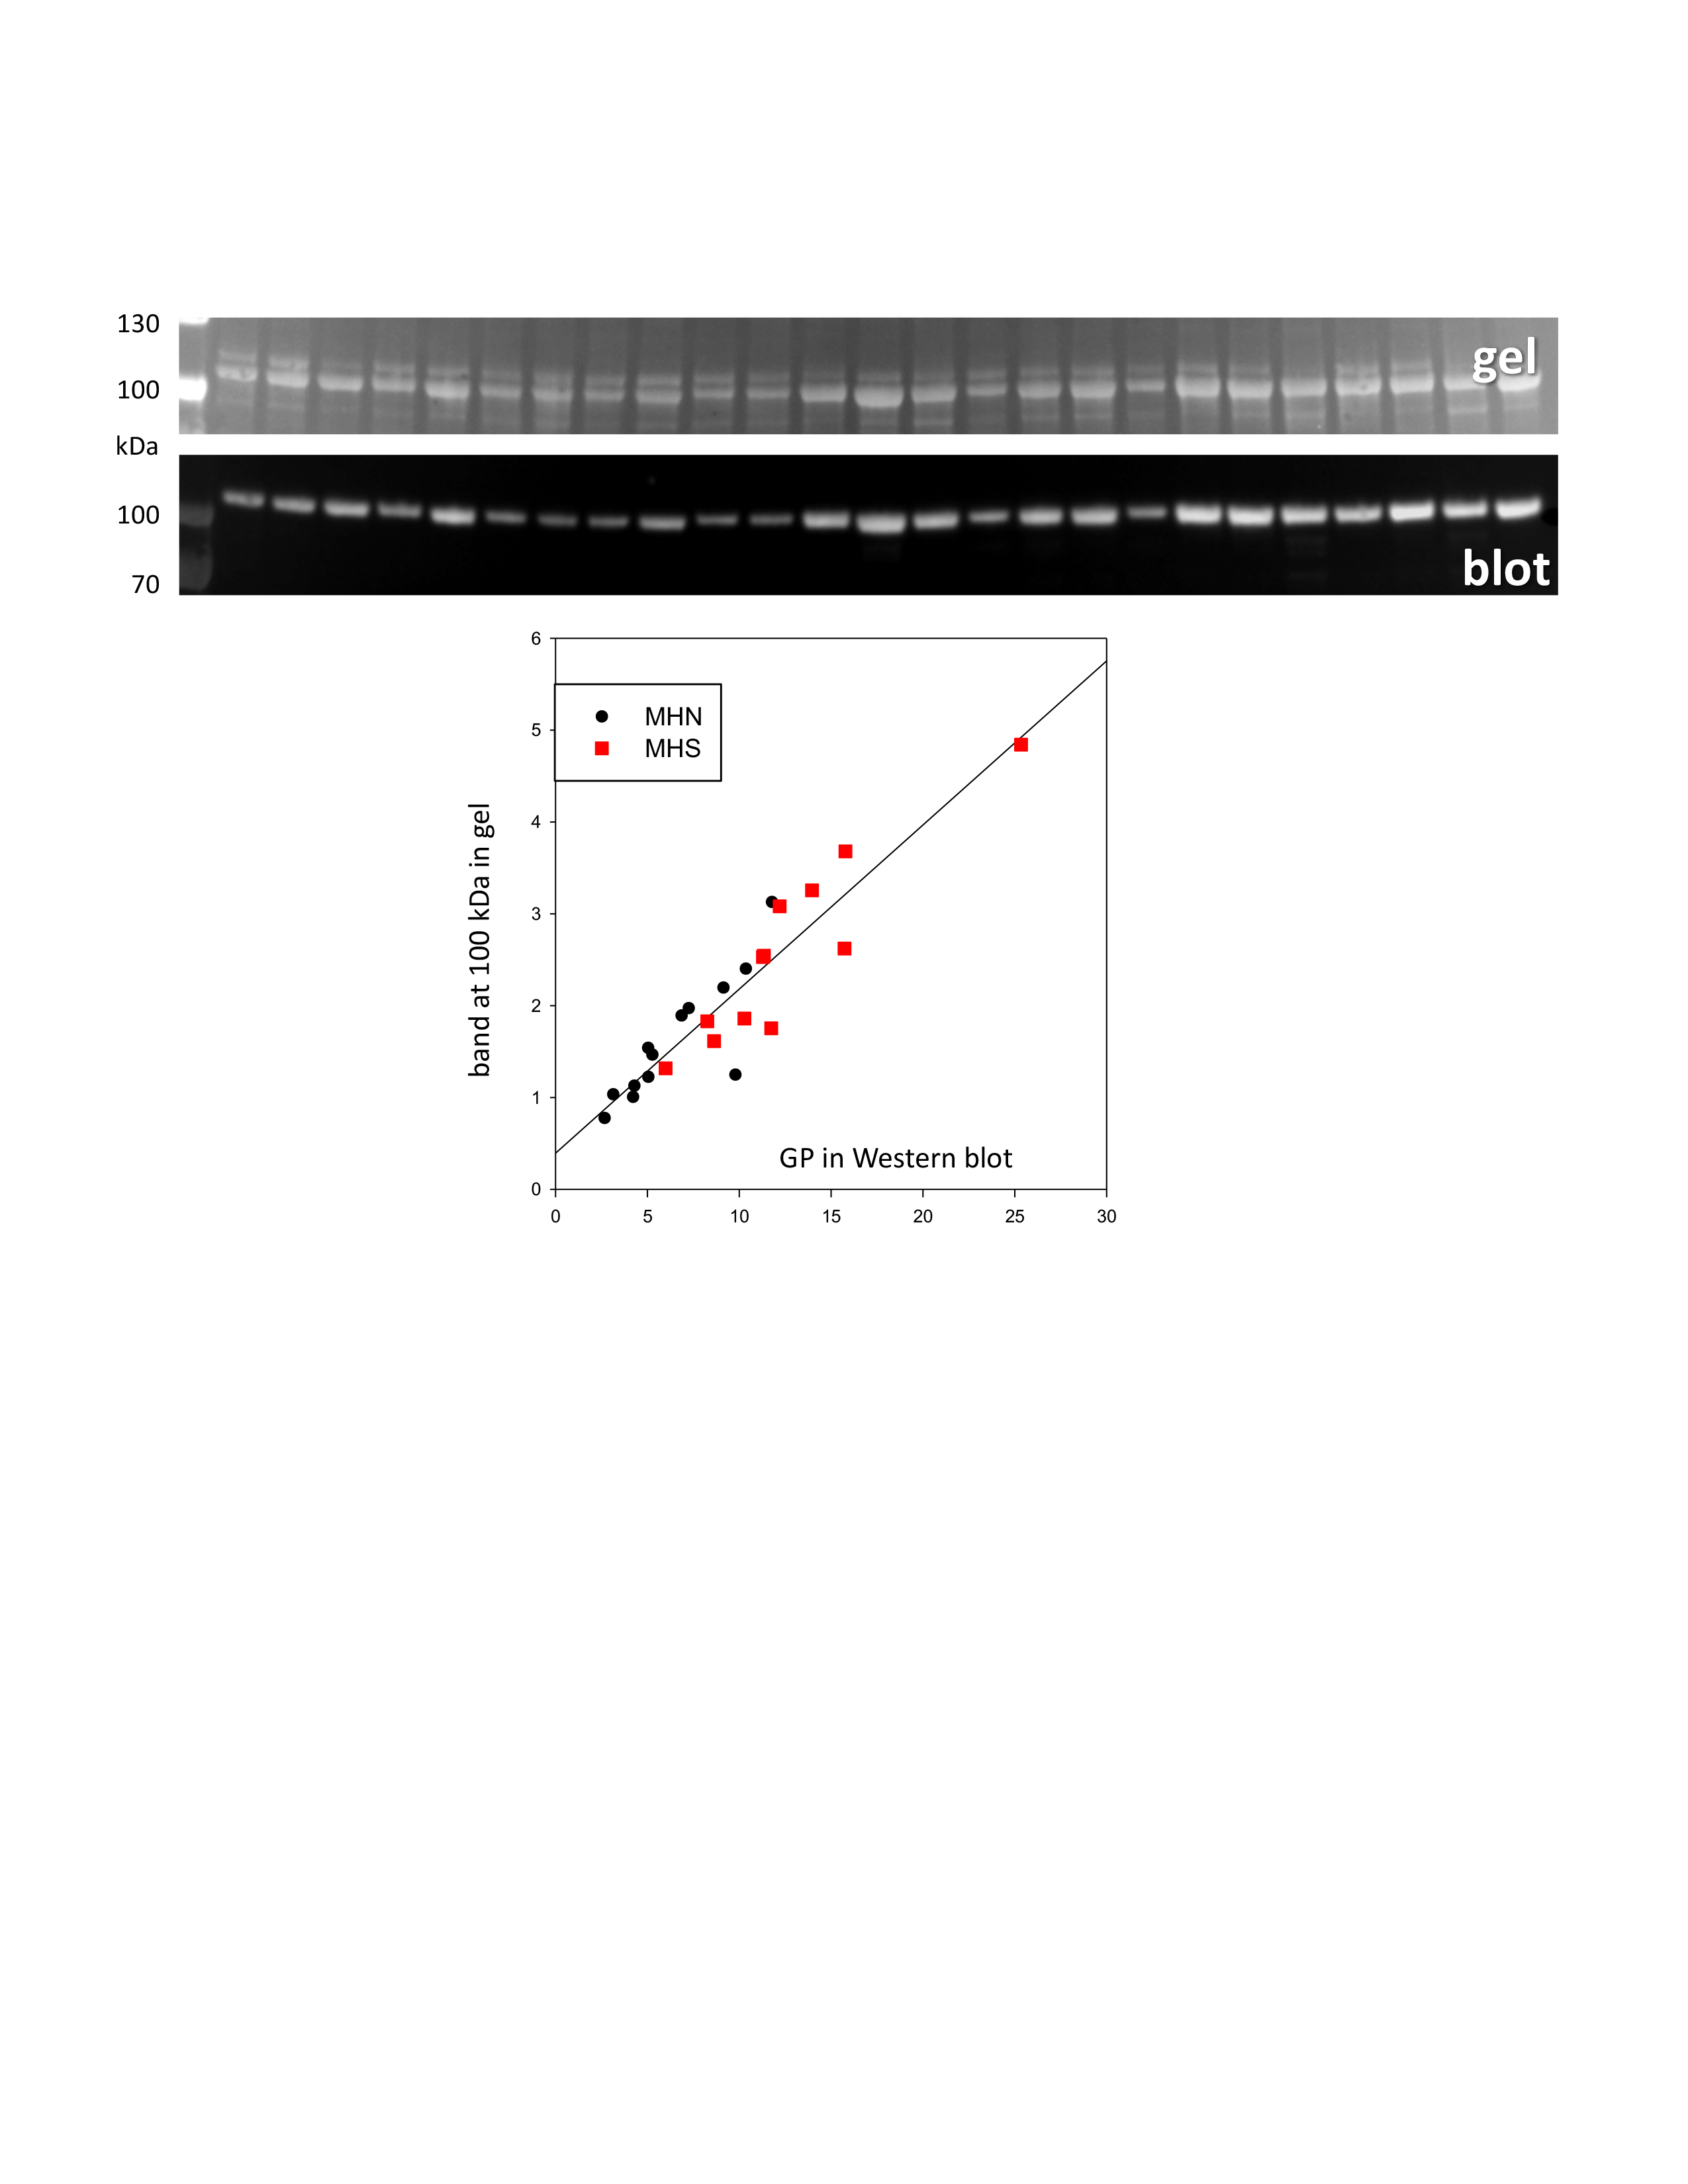

Supplement: supp [file elife-53999-supp-v1.zip › elife_poa_e53999_Figure_2_figure_supplement_4.tif]

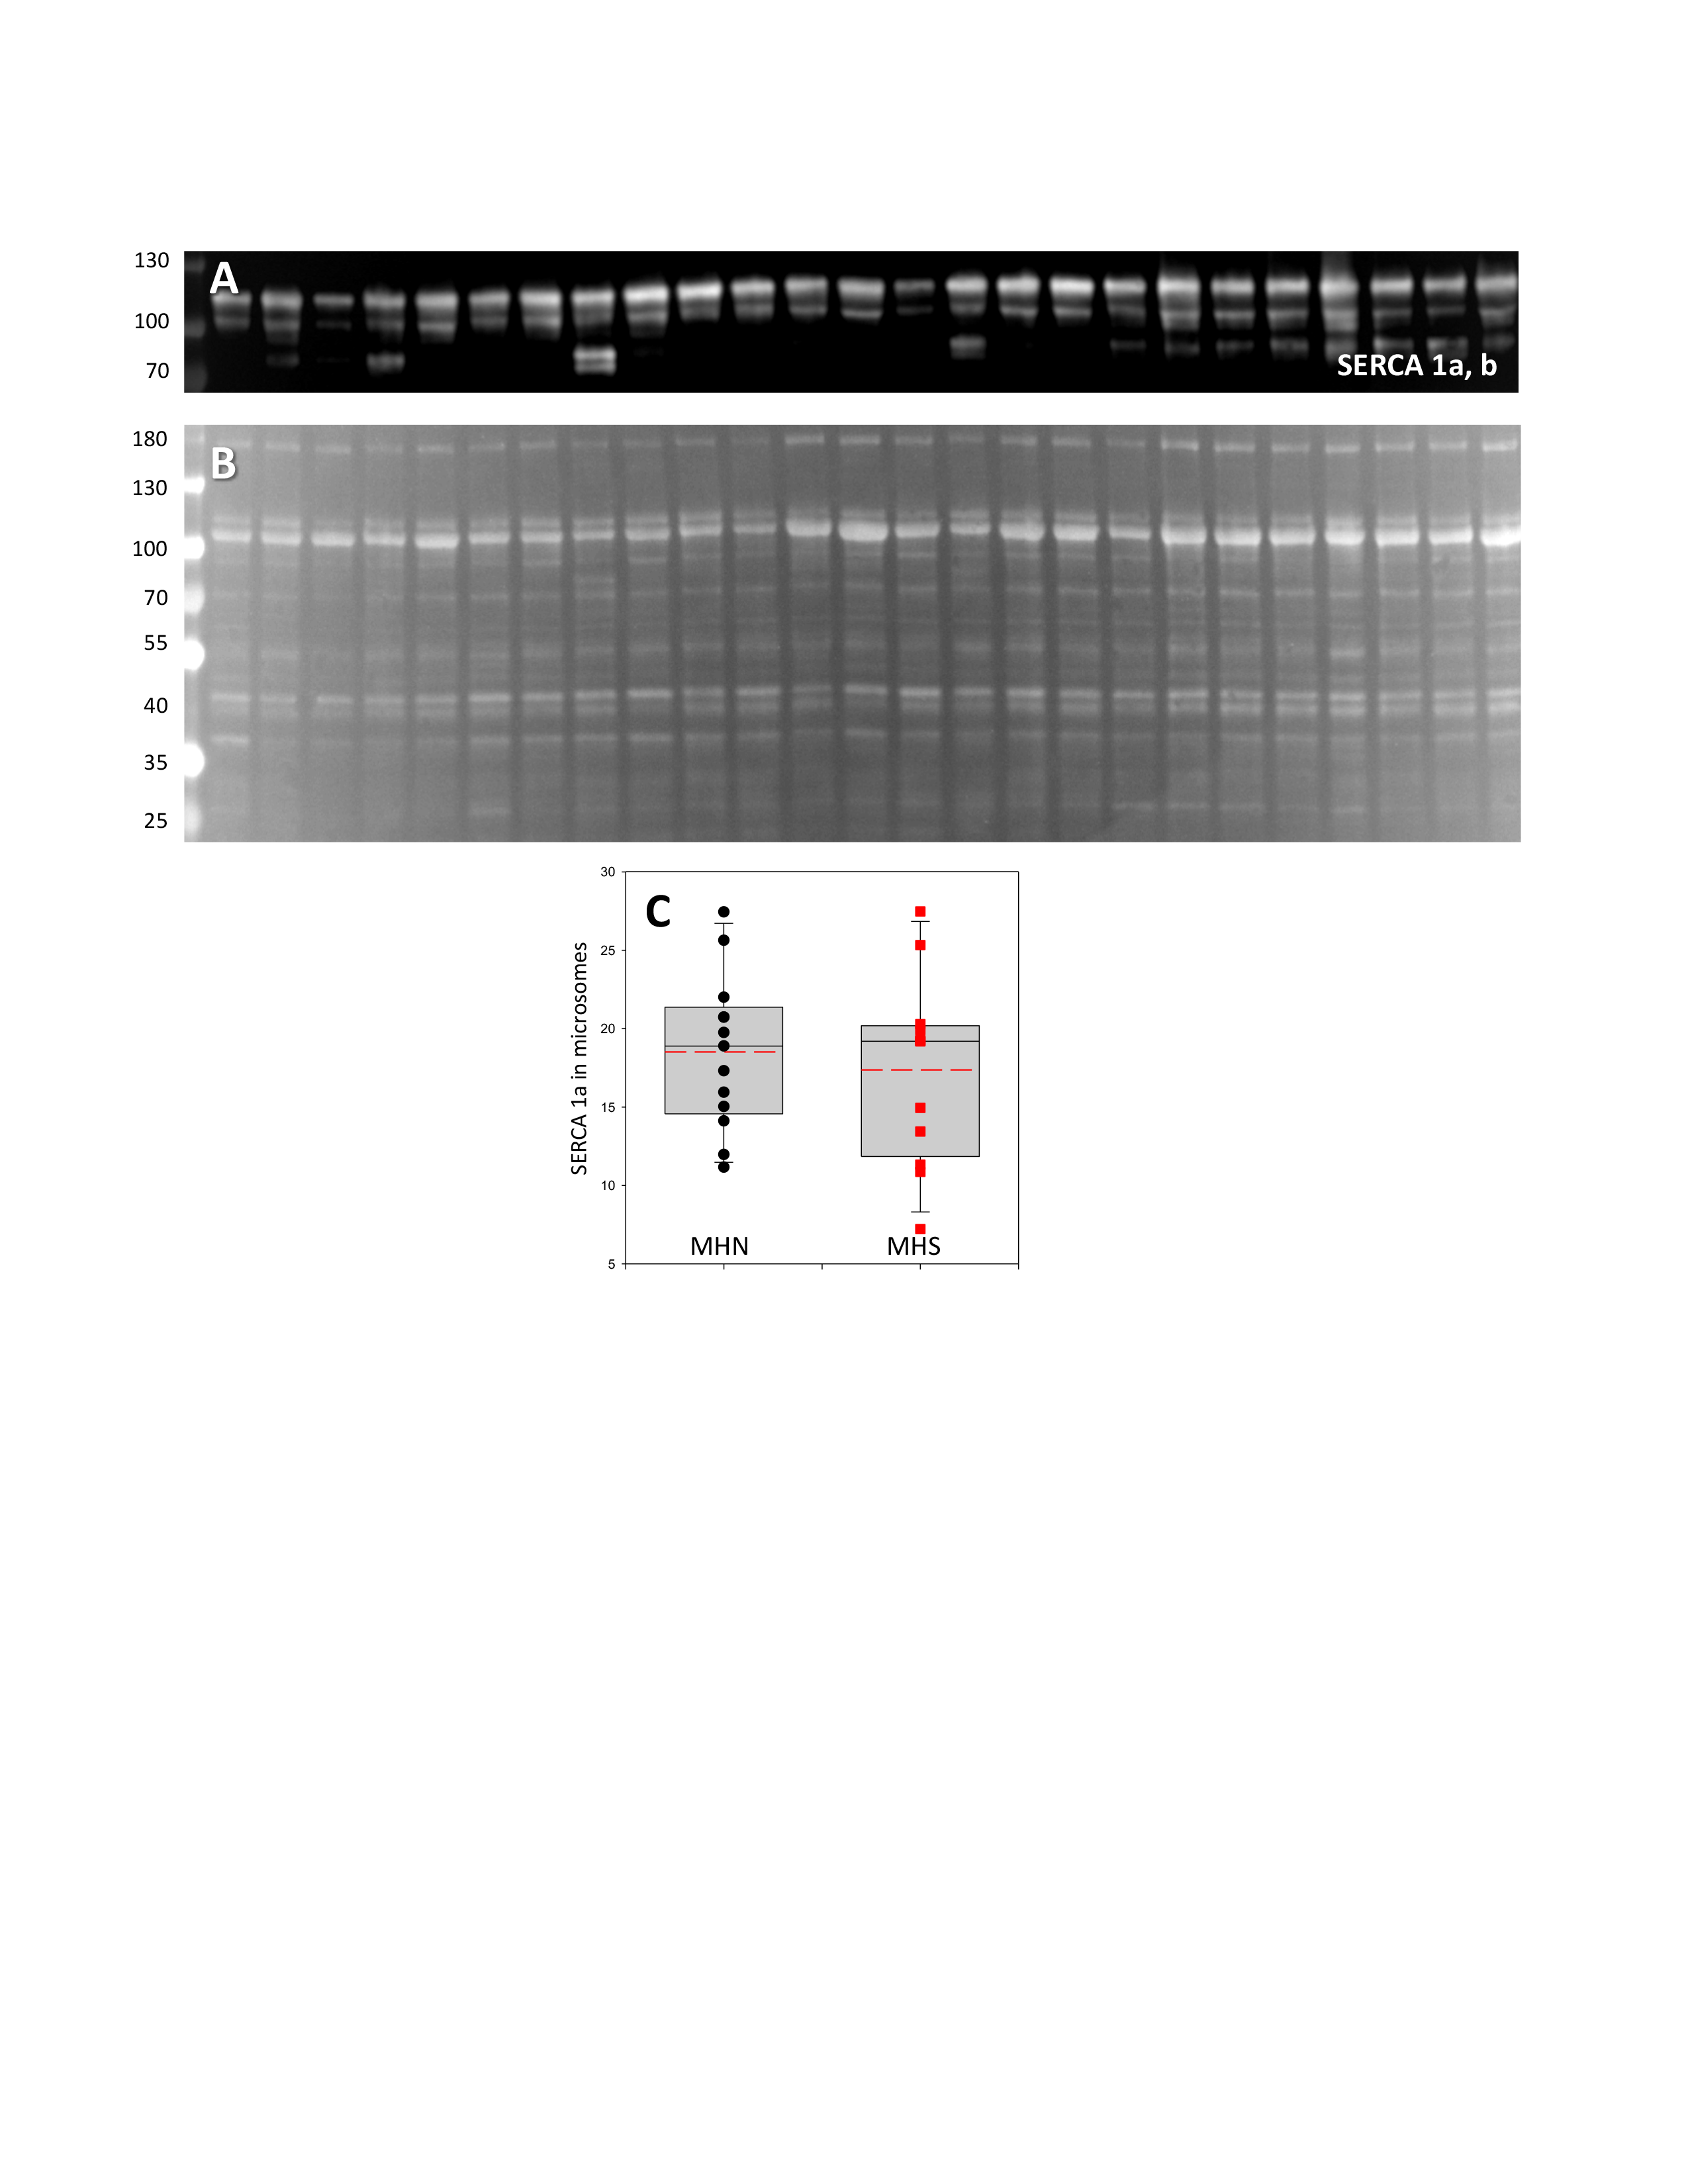

Supplement: supp [file elife-53999-supp-v1.zip › elife_poa_e53999_Figure_2_figure_supplement_5.tif]

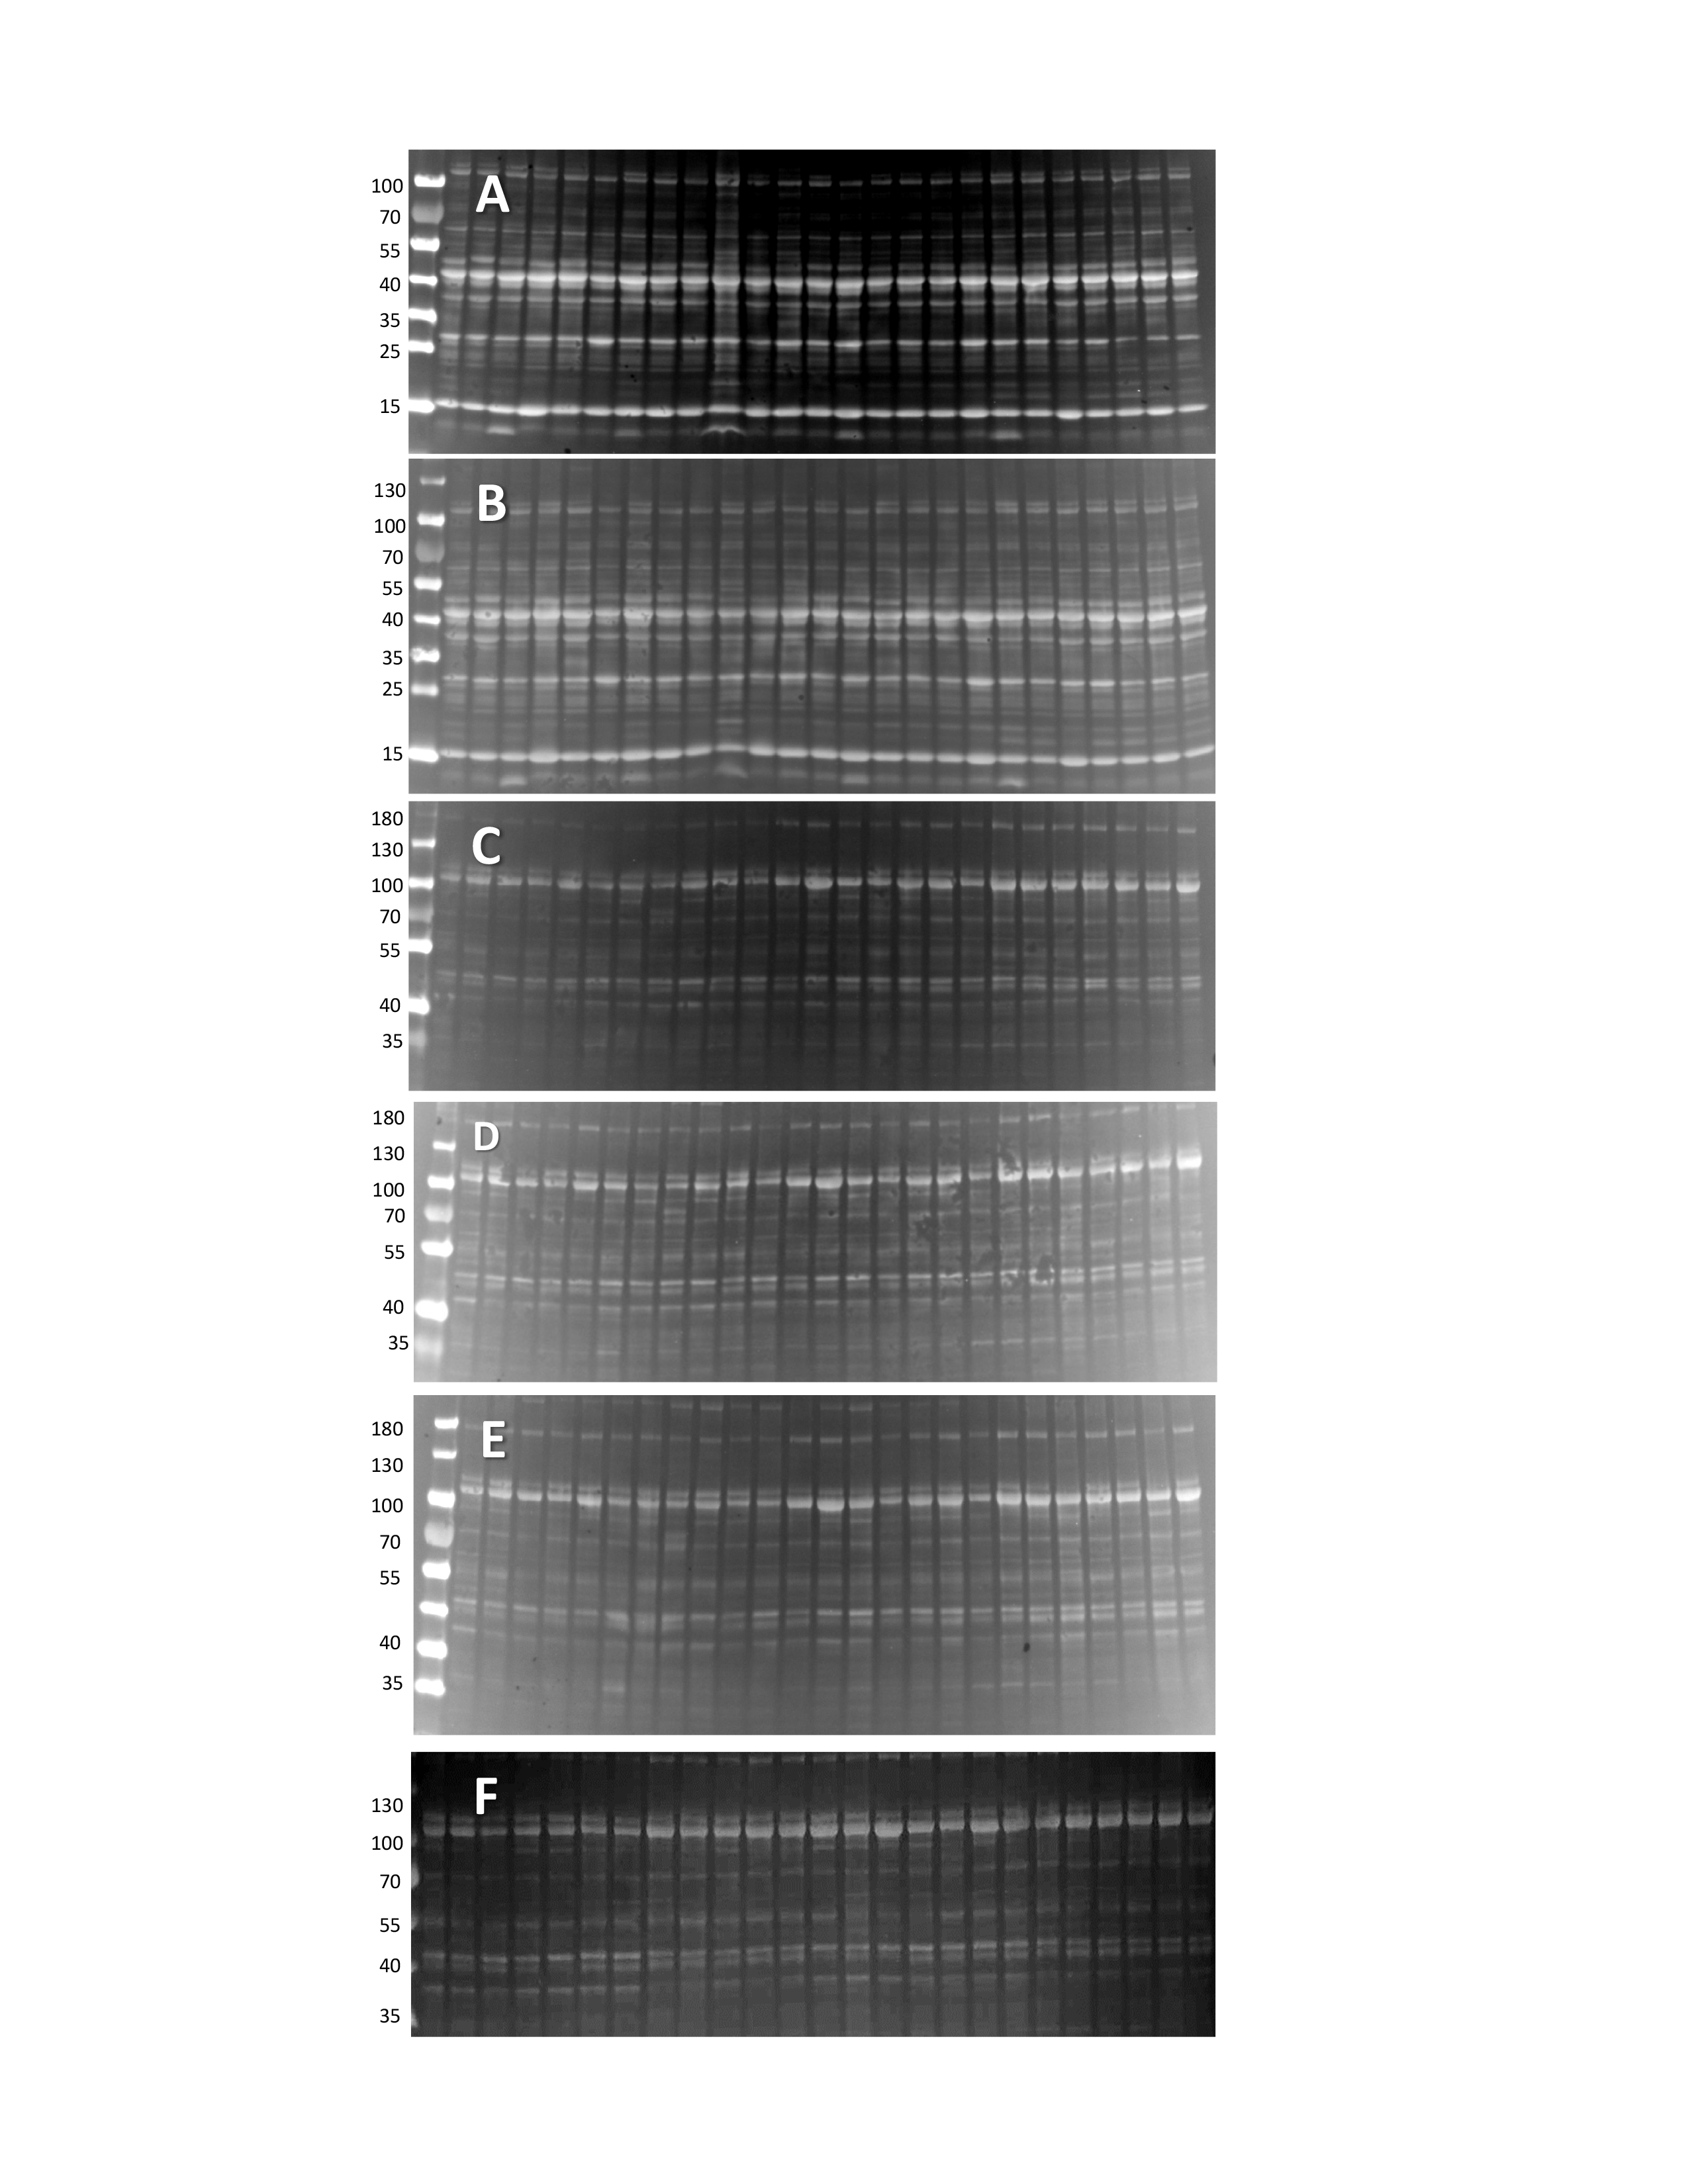

Supplement: supp [file elife-53999-supp-v1.zip › elife_poa_e53999_Figure_3_figure_supplement_1.tif]

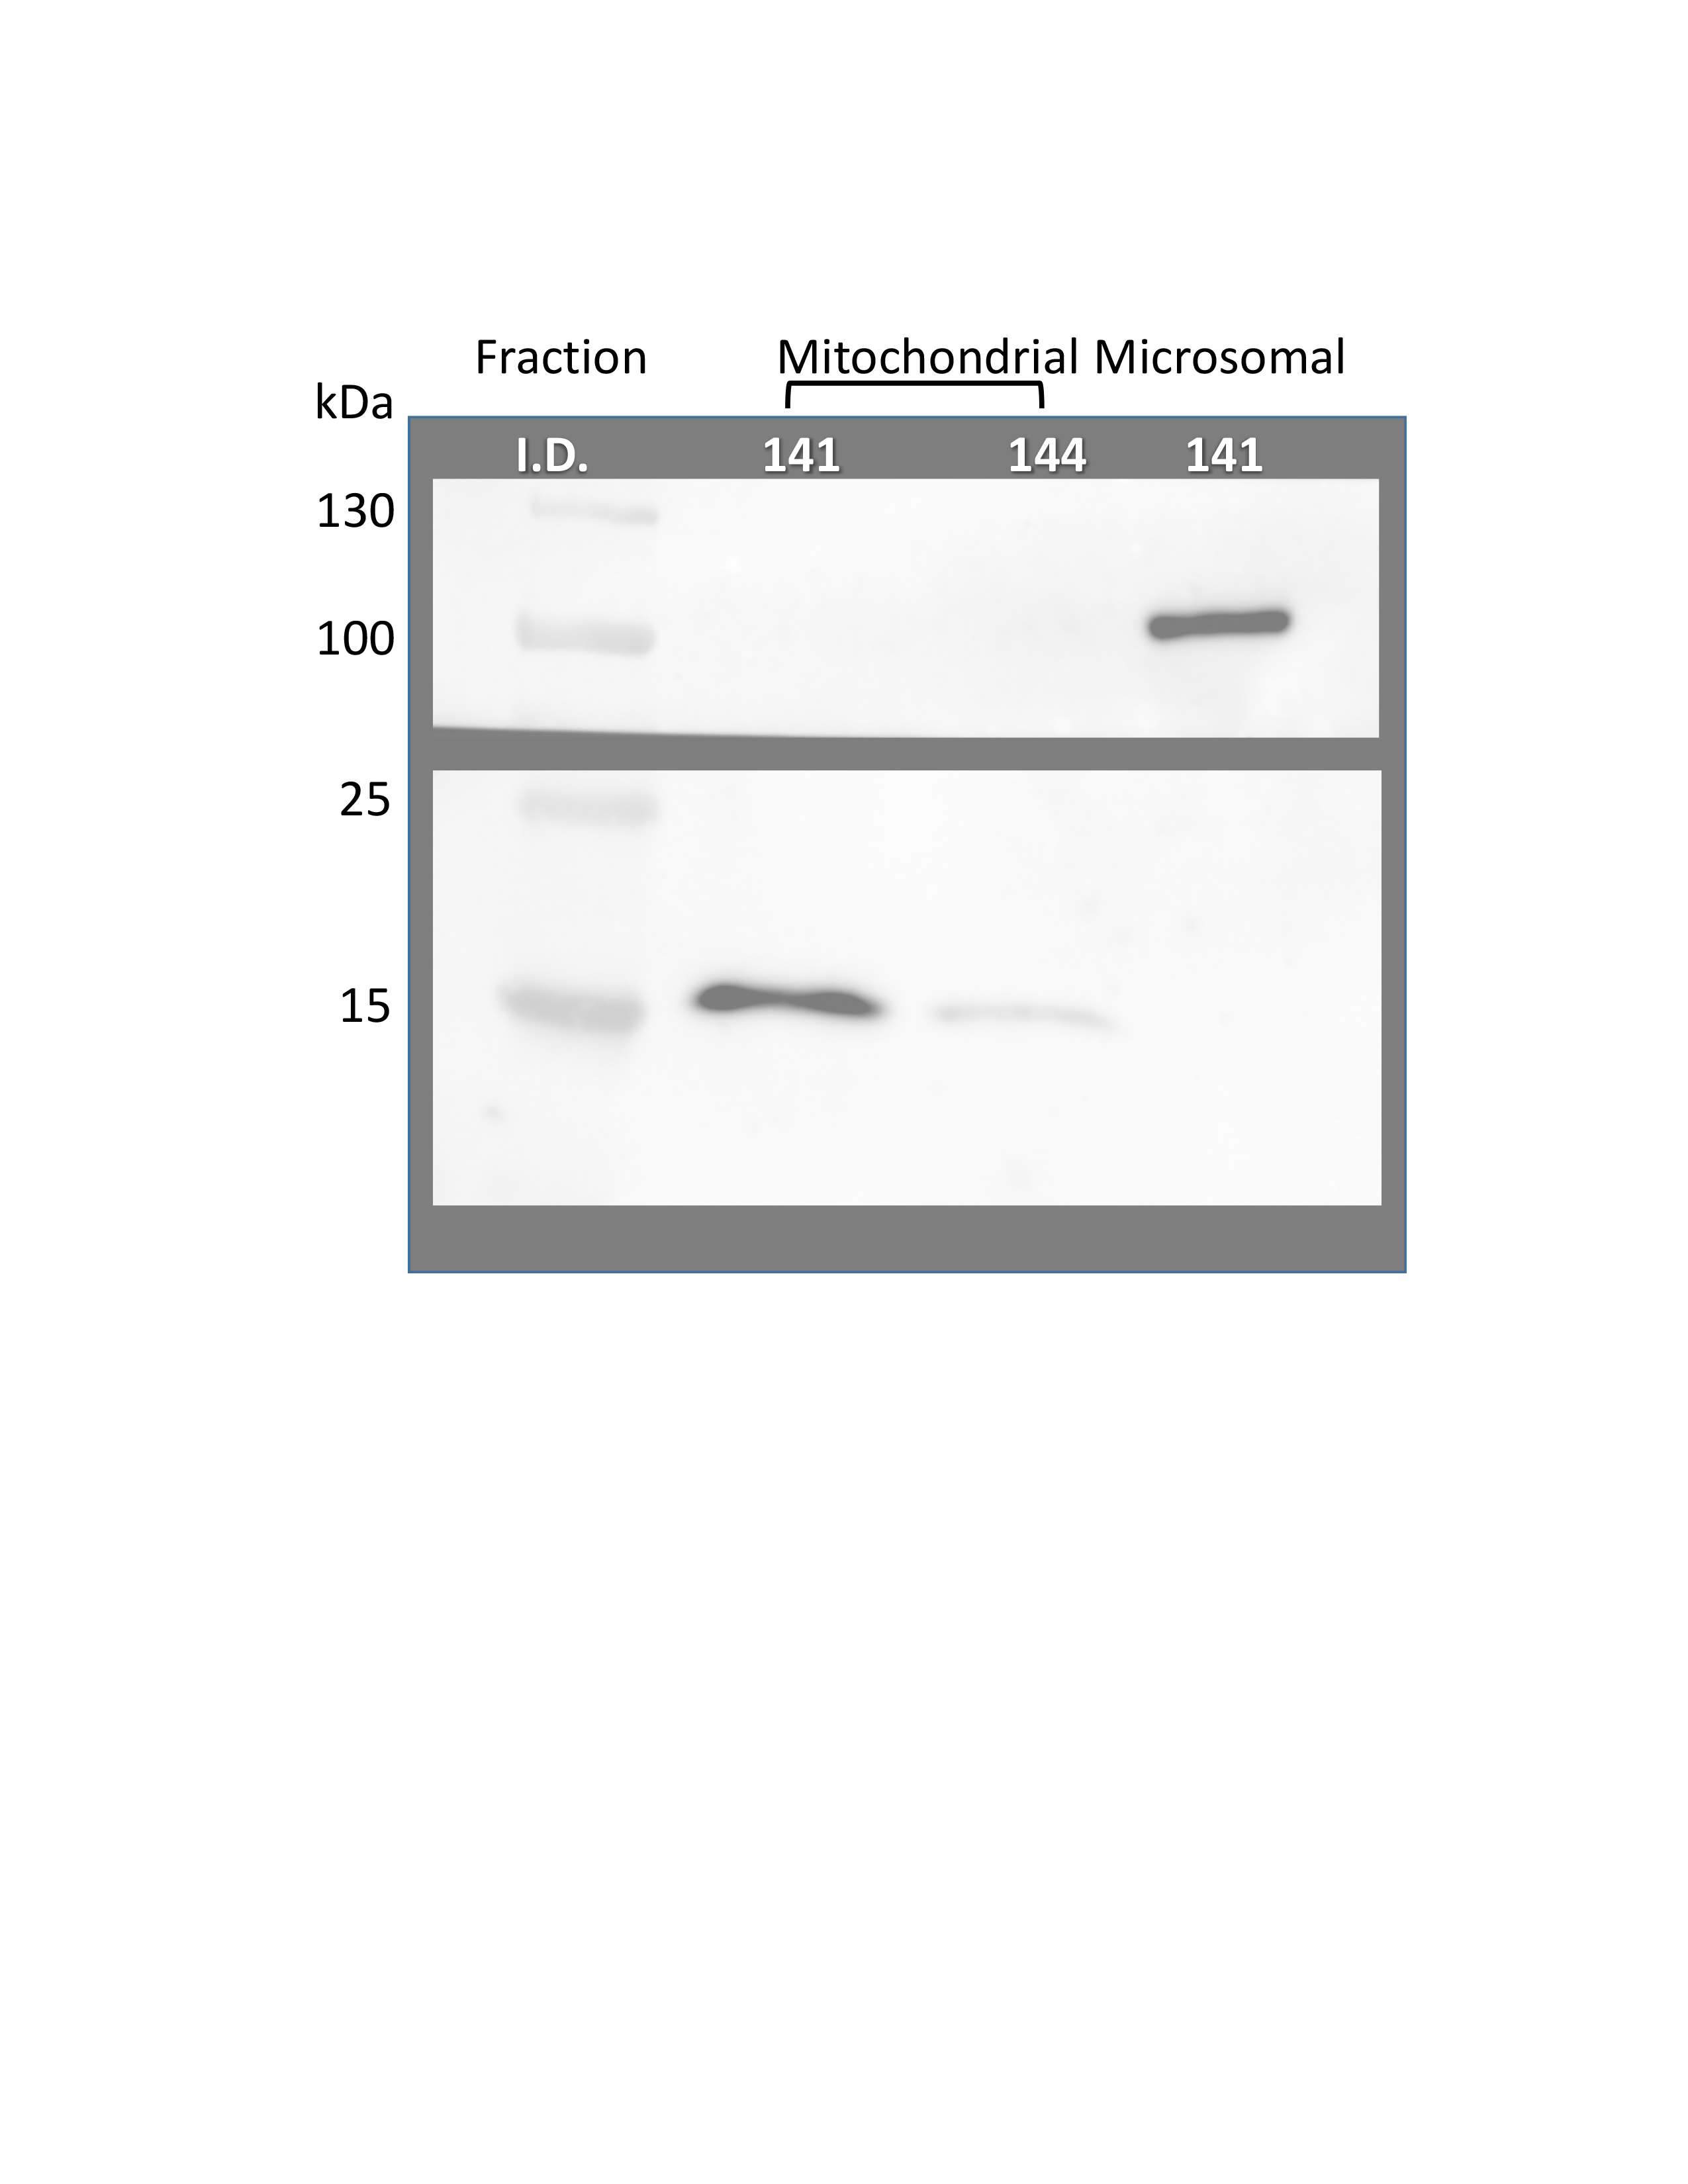

Supplement: supp [file elife-53999-supp-v1.zip › elife_poa_e53999_Figure_4_figure_supplement_1.tif]

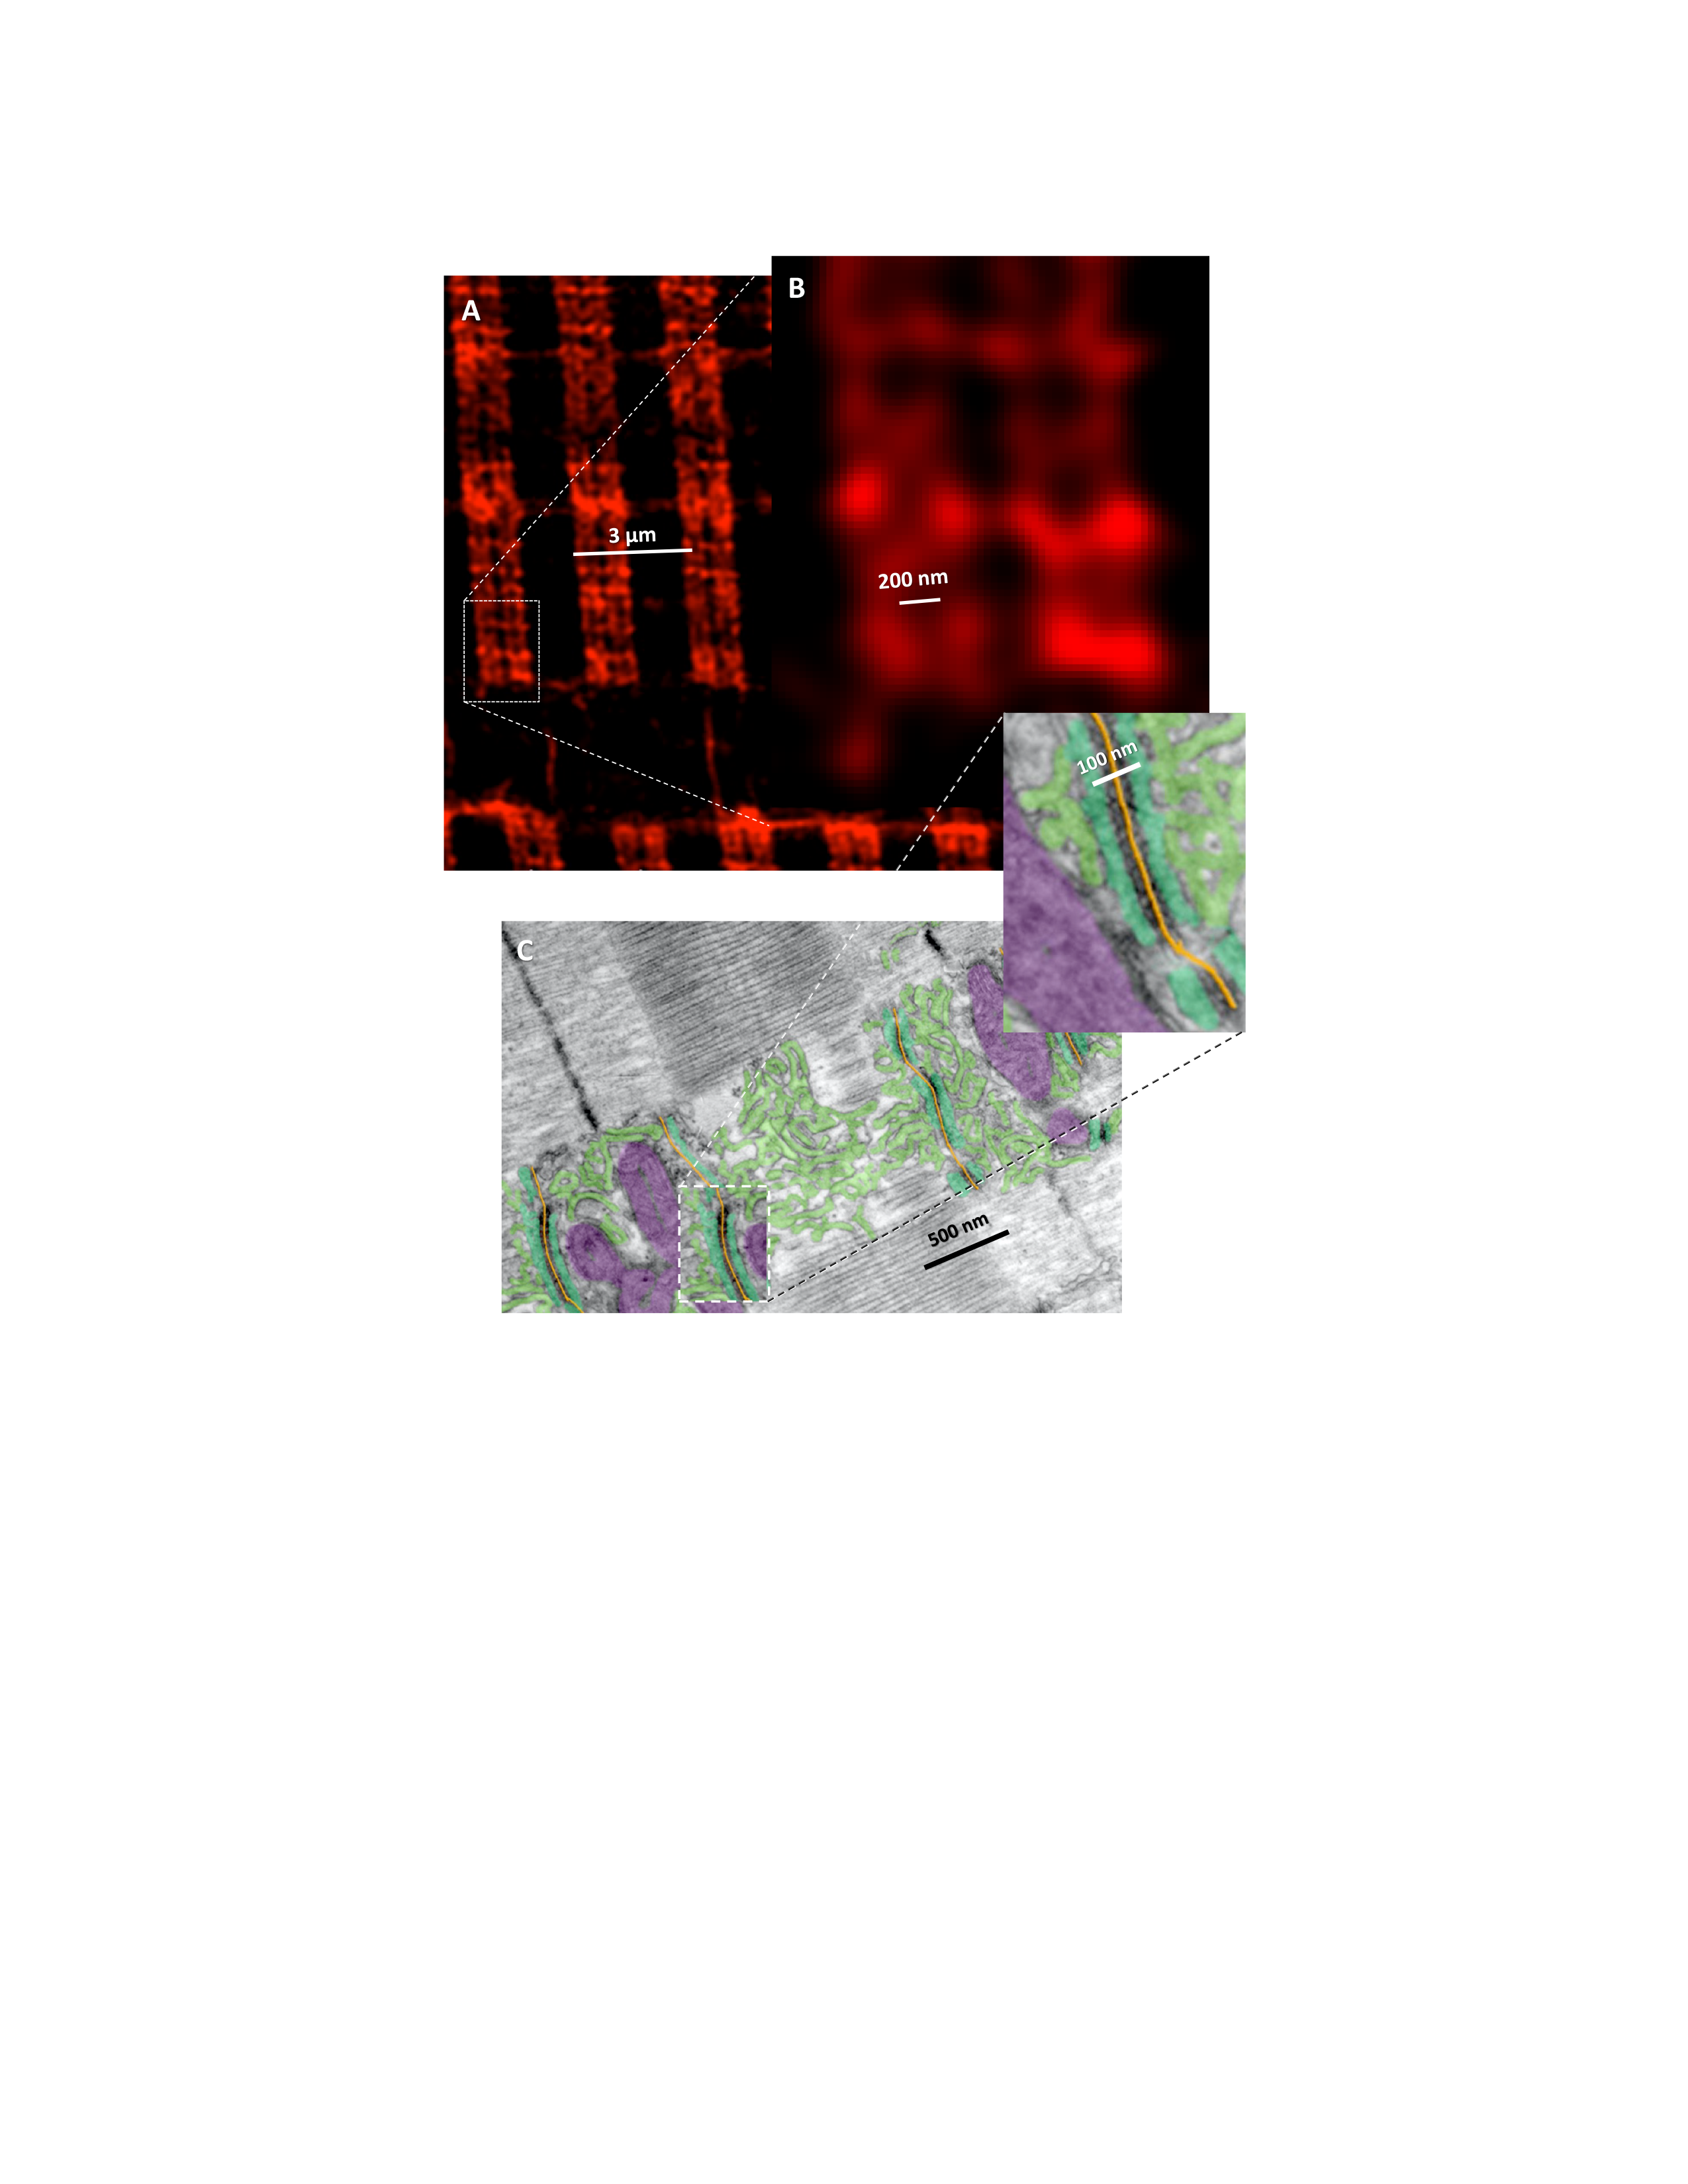

Supplement: supp [file elife-53999-supp-v1.zip › elife_poa_e53999_Figure_5_figure_supplement_1.tif]

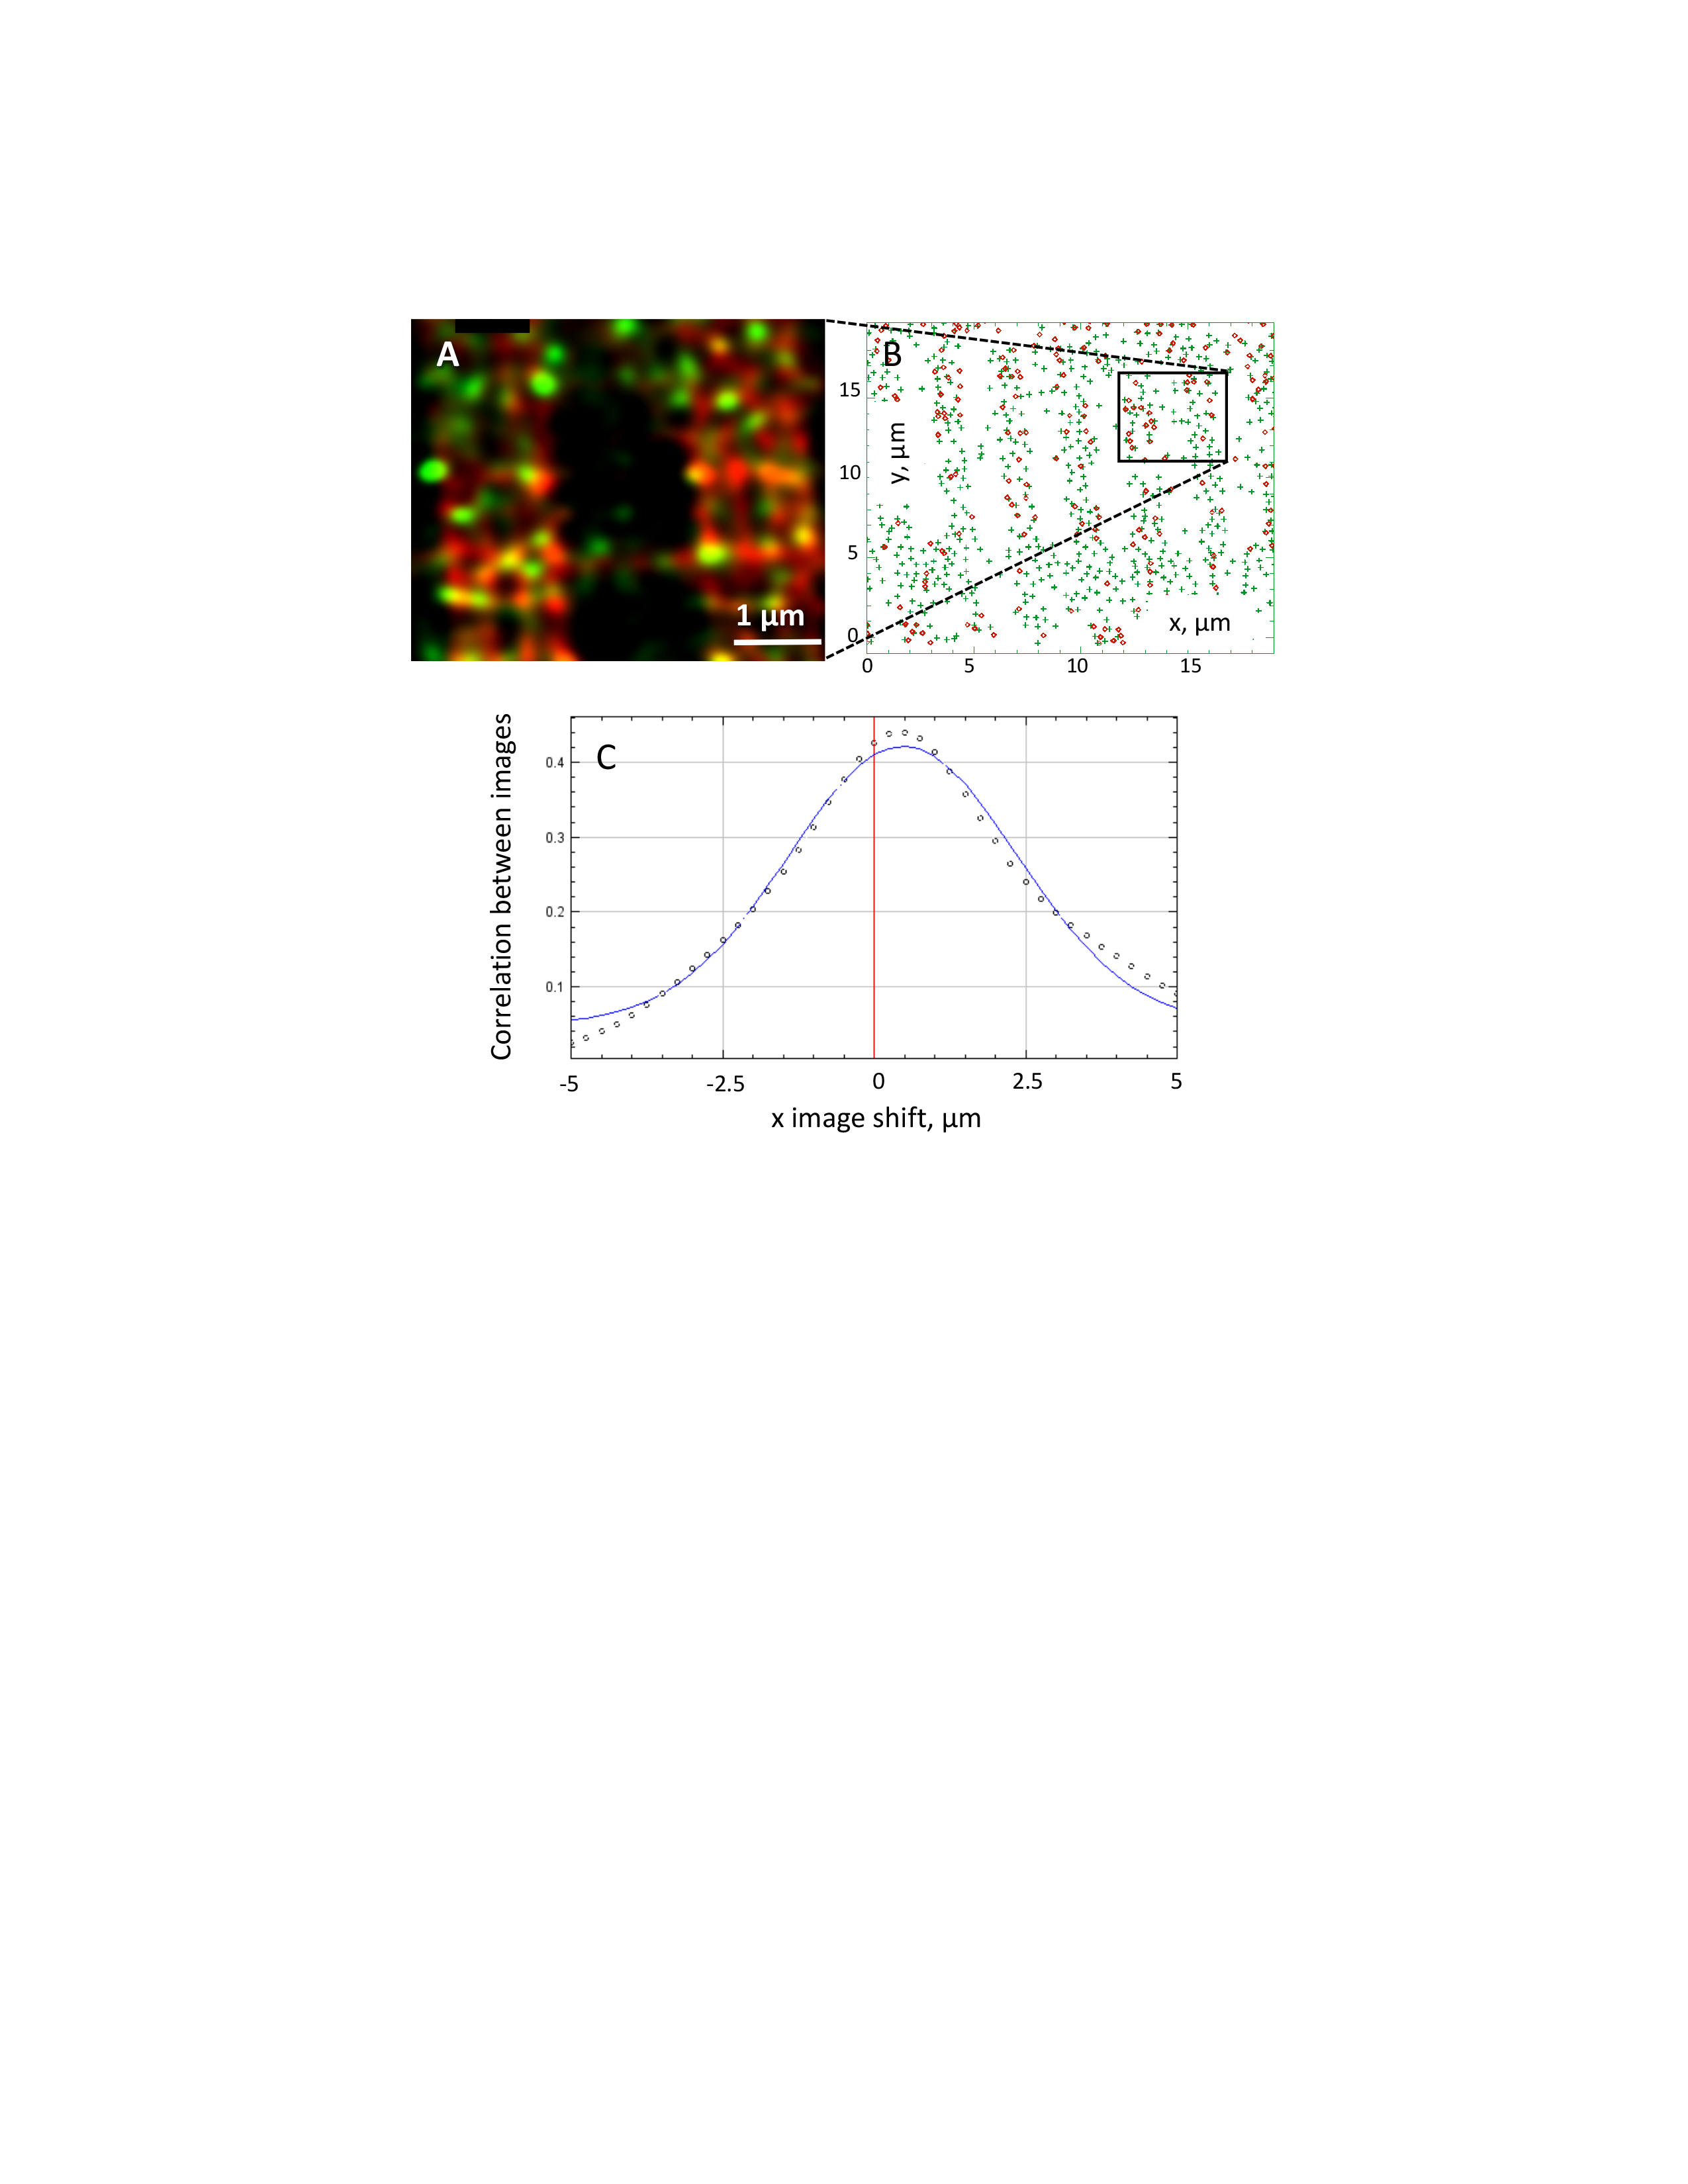

Supplement: supp [file elife-53999-supp-v1.zip › elife_poa_e53999_Figure_5_figure_supplement_2.tif]

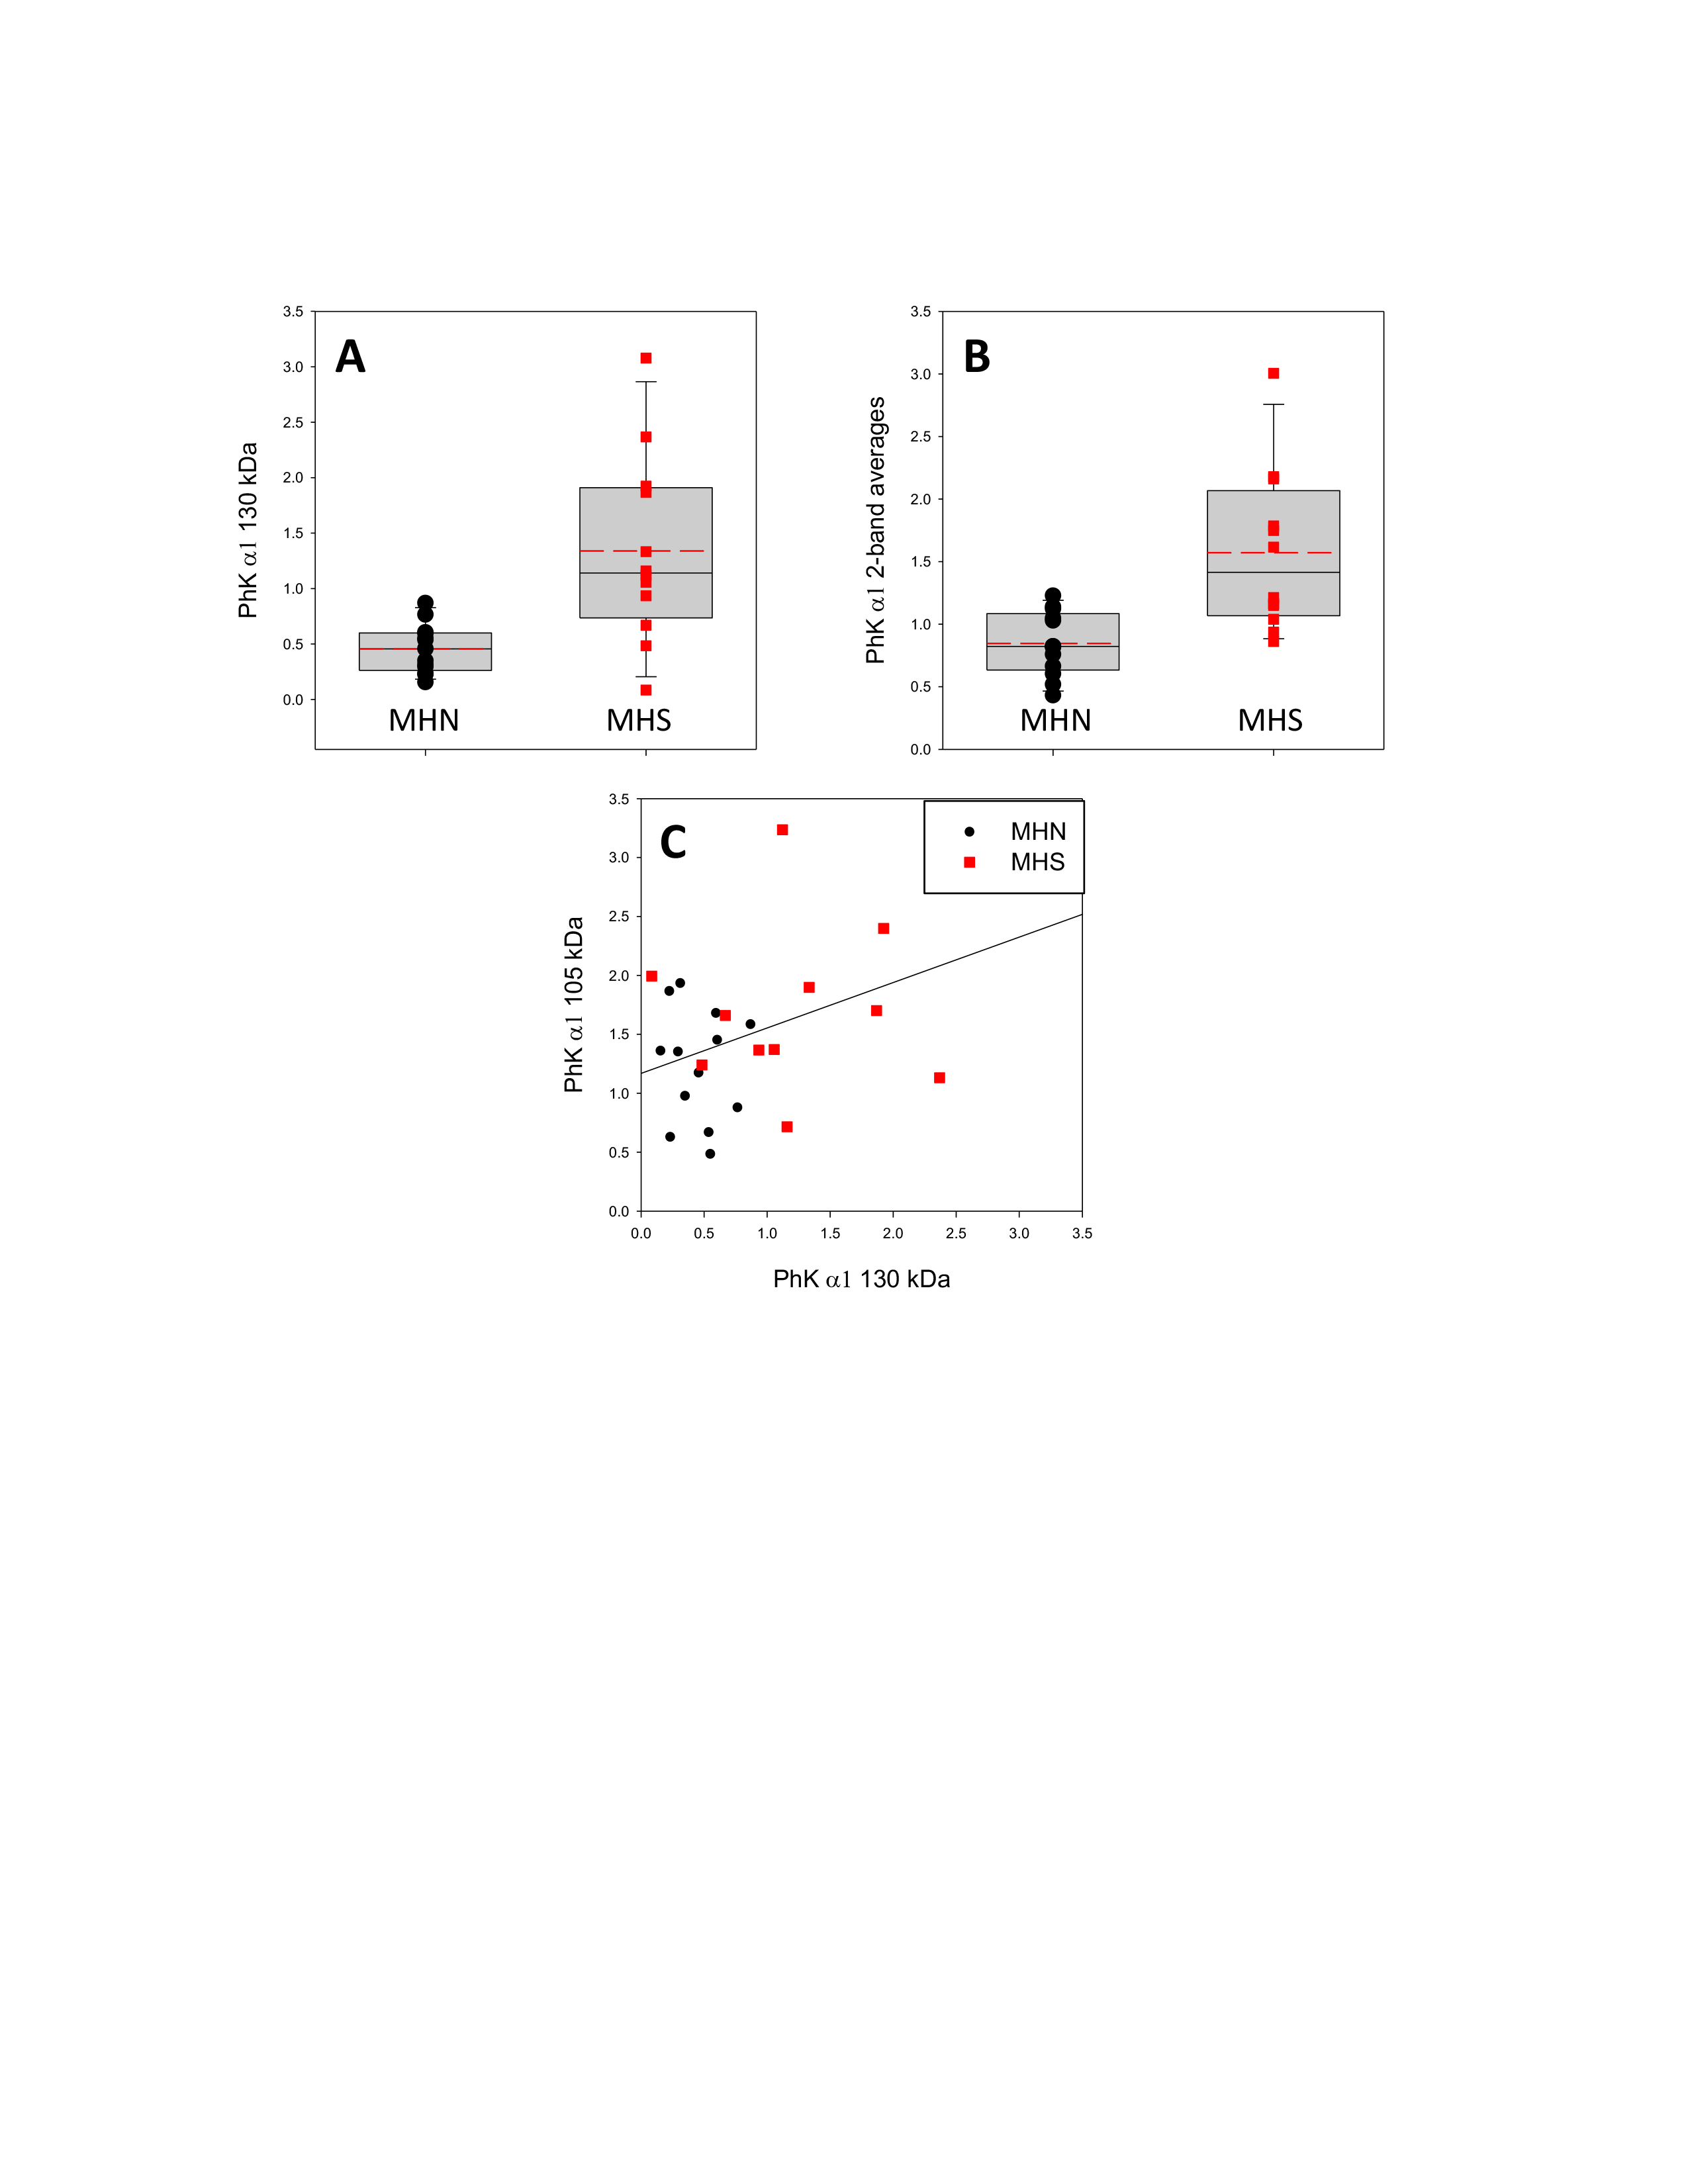

Supplement: supp [file elife-53999-supp-v1.zip › elife_poa_e53999_Figure_6_figure_supplement_1.tif]
